# Supplementary material for: Amyloid-like aggregates cause lysosomal defects in neurons via gain-of-function toxicity
Source: bioRxiv preprint, doi:10.1101/2019.12.16.877431, version 3 (2021-05-06)
Supplement: Supplementary Table S2 [file 877431_file03.xlsx]

## Sheet: Interactors, proteome changes
GOMF.name	GOBP.slim.name	GOCC.slim.name	KEGG.name	Keywords	Corum	Pfam	IP_Significant.Cherry.vs.B4	IP_Significant.Cherry.vs.B17	IP_Significant.Cherry.vs.B23	wholeProteome_Significant.mCherry.vs.B4	wholeProteome_Significant.mCherry.vs.B17	wholeProteome_Significant.mCherry.vs.B23	IP_p.value.Cherry.vs.B4	IP_Difference.Cherry.vs.B4	IP_p.value.Cherry.vs.B17	IP_Difference.Cherry.vs.B17	IP_p.value.Cherry.vs.B23	IP_Difference.Cherry.vs.B23	wholeProteome_p.value.mCherry.vs.B4	wholeProteome_Difference.mCherry.vs.B4	wholeProteome_p.value.mCherry.vs.B17	wholeProteome_Difference.mCherry.vs.B17	wholeProteome_p.value.mCherry.vs.B23	wholeProteome_Difference.mCherry.vs.B23	Majority.protein.IDs	Protein.names	Gene.names	B4_olzscha	B17_olzscha	B23_olzscha
	cellular component movement;cellular process;cytoskeleton-dependent intracellular transport;establishment of localization;protein transport;transport;vesicle-mediated transport	AP-type membrane coat adaptor complex;cell part;Golgi apparatus;intracellular membrane-bounded organelle;intracellular organelle;macromolecular complex;organelle;protein complex	Lysosome	Completeproteome;Golgiapparatus;Proteintransport;Referenceproteome;Transport	Agap11-AP3 complex	Adap_comp_sub;Clat_adaptor_s	+	+	+				1.67393	-6.67565	0.862056	-4.70553	1.62945	-6.49601	0.468157	-0.175813	0.373399	-0.116845	0.0703796	0.0285497	Q9JKC8;H7BWY2	AP-3 complex subunit mu-1	Ap3m1
		cell part		Acetylation;Coiledcoil;Completeproteome;Phosphoprotein;Referenceproteome		TPD52	+	+	+				1.9537	-2.25689	1.62176	-1.85149	2.49235	-5.01869	0.136733	-0.101502	0.0926196	-0.0663915	0.632902	-0.355659	A2AUD5;Q9CYZ2;A2AUD6;Q3TAI4	Tumor protein D54	Tpd52l2
binding;DNA binding;nucleic acid binding	biological regulation;biosynthetic process;cellular metabolic process;cellular nitrogen compound metabolic process;cellular process;DNA metabolic process;DNA recombination;DNA repair;macromolecule metabolic process;metabolic process;nitrogen compound metabolic process;nucleobase-containing compound metabolic process;primary metabolic process;response to DNA damage stimulus;response to stimulus;re…	cell part;chromatin remodeling complex;DNA helicase complex;intracellular membrane-bounded organelle;intracellular organelle;macromolecular complex;nucleus;organelle;protein complex		Acetylation;Completeproteome;DNA-binding;DNAdamage;DNArecombination;DNArepair;Nucleus;Phosphoprotein;Referenceproteome;Transcription;Transcriptionregulation		NFRKB_winged	+	+	+				2.74534	-3.14064	1.67027	-2.85419	3.3156	-4.47841	-4.34294e-08	0	-4.34294e-08	0	-4.34294e-08	0	Q6PIJ4	Nuclear factor related to kappa-B-binding protein	Nfrkb
catalytic activity;enzyme activator activity;enzyme regulator activity;kinase activator activity;kinase regulator activity	anatomical structure development;anatomical structure morphogenesis;biological regulation;cellular process;developmental process;embryo development;metabolic process;regulation of protein modification process;response to stimulus;signal transduction		Leishmaniasis;MAPK signaling pathway;NOD-like receptor signaling pathway;Osteoclast differentiation;Toll-like receptor signaling pathway;Toxoplasmosis	Completeproteome;Phosphoprotein;Referenceproteome;Ublconjugation		PP2C	+	+	+				3.00204	-3.37725	3.98837	-4.21056	3.3924	-4.30809	0.274408	-0.390593	0.578115	-0.549806	1.2336	-0.903682	Q8CF89	TGF-beta-activated kinase 1 and MAP3K7-binding protein 1	Tab1
		cell part;cytoplasm;microtubule organizing center		Alternativesplicing;Completeproteome;Cytoplasm;Cytoskeleton;Phosphoprotein;Referenceproteome		MOR2-PAG1_C;MOR2-PAG1_N	+	+	+				2.31685	-2.67177	3.43128	-3.89626	2.13075	-4.14719	0.228259	0.0592823	0.412204	-0.101828	0.0271566	0.00807238	E9Q8I9	Protein furry homolog	Fry
binding;lipid binding;phosphatidic acid binding;phosphatidylinositol binding;phosphatidylinositol-3,4-bisphosphate binding;phosphatidylinositol-3,5-bisphosphate binding;phosphatidylinositol-3-phosphate binding;phosphatidylinositol-4,5-bisphosphate binding;phosphatidylinositol-4-phosphate binding;phosphatidylinositol-5-phosphate binding;phospholipid binding		cell part;macromolecular complex;protein complex		Completeproteome;Referenceproteome;Repeat			+	+	+				5.33089	-3.3518	3.11972	-3.04588	4.96185	-3.95515	0.69372	-0.0906239	0.585029	-0.0869055	0.750647	0.129908	Q80UK0	SEC14 domain and spectrin repeat-containing protein 1	Sestd1
3-mercaptopyruvate sulfurtransferase activity;catalytic activity;sulfurtransferase activity;thiosulfate sulfurtransferase activity;transferase activity;transferase activity, transferring sulfur-containing groups	biosynthetic process;cellular metabolic process;cellular process;metabolic process;sulfur compound metabolic process	cell part;cell projection;membrane;neuron projection;synapse	Cysteine and methionine metabolism;Sulfur relay system	Celljunction;Completeproteome;Cytoplasm;Directproteinsequencing;Disulfidebond;Mitochondrion;Redox-activecenter;Referenceproteome;Repeat;Synapse;Synaptosome;Transferase		Rhodanese	+	+	+				4.73487	-3.58875	4.60616	-3.67629	4.67908	-3.69094	0.0168343	-0.00476599	0.316827	0.0903721	0.124587	-0.0398932	Q99J99;Q3UW66;D3YYT8	3-mercaptopyruvate sulfurtransferase;Sulfurtransferase	Mpst
adenyl nucleotide binding;adenyl ribonucleotide binding;ATP binding;binding;catalytic activity;cytoskeletal protein binding;gamma-tubulin binding;kinase activity;microtubule binding;nucleotide binding;phosphotransferase activity, alcohol group as acceptor;protein binding;protein kinase activity;protein serine/threonine kinase activity;purine nucleotide binding;purine ribonucleoside triphosphate b…	anatomical structure development;cellular component organization;cellular process;cytoskeleton organization;developmental process;organelle organization	cell part;cell projection;centrosome;intracellular non-membrane-bounded organelle;intracellular organelle;microtubule organizing center;neuron projection;organelle		ATP-binding;Completeproteome;Directproteinsequencing;Kinase;Nucleotide-binding;Phosphoprotein;Referenceproteome;Serine/threonine-proteinkinase;Transferase;Ublconjugation		KA1;Pkinase;UBA	+	+	+				3.42608	-3.3746	4.26653	-3.23731	4.0037	-3.63259	0.0668476	-0.0215778	0.716043	-0.171883	0.0217805	-0.0142031	Q8CIP4	MAP/microtubule affinity-regulating kinase 4	Mark4
adenyl nucleotide binding;adenyl ribonucleotide binding;ATP binding;binding;catalytic activity;cation binding;ion binding;kinase activity;magnesium ion binding;MAP kinase kinase activity;MAP kinase kinase kinase activity;metal ion binding;molecular transducer activity;nucleotide binding;phosphotransferase activity, alcohol group as acceptor;protein kinase activity;protein serine/threonine kinase …	anatomical structure formation involved in morphogenesis;biological regulation;biosynthetic process;cell death;cellular metabolic process;cellular nitrogen compound metabolic process;cellular process;death;developmental process;macromolecule metabolic process;macromolecule modification;metabolic process;nitrogen compound metabolic process;nucleobase-containing compound metabolic process;phosphoru…	cell part;cytoplasm;membrane;plasma membrane	Adherens junction;Leishmaniasis;MAPK signaling pathway;Measles;NOD-like receptor signaling pathway;Osteoclast differentiation;RIG-I-like receptor signaling pathway;T cell receptor signaling pathway;Toll-like receptor signaling pathway;Toxoplasmosis;Wnt signaling pathway	Apoptosis;ATP-binding;Cellmembrane;Completeproteome;Cytoplasm;Kinase;Magnesium;Membrane;Metal-binding;Nucleotide-binding;Phosphoprotein;Referenceproteome;Serine/threonine-proteinkinase;Stressresponse;Transcription;Transcriptionregulation;Transferase;Ublconjugation		Pkinase_Tyr	+	+	+				2.43775	-3.06277	3.63857	-3.82915	3.40087	-3.56849	-4.34294e-08	0	-4.34294e-08	0	-4.34294e-08	0	Q62073;Q543B5;Q923A8;A2AP93;A2AP92	Mitogen-activated protein kinase kinase kinase 7	Map3k7
adenyl nucleotide binding;adenyl ribonucleotide binding;ATP binding;binding;catalytic activity;kinase activity;nucleotide binding;phosphotransferase activity, alcohol group as acceptor;protein kinase activity;protein serine/threonine kinase activity;purine nucleotide binding;purine ribonucleoside triphosphate binding;purine ribonucleotide binding;ribonucleotide binding;transferase activity;transf…	biological regulation;biosynthetic process;cell cycle;cell death;cellular metabolic process;cellular nitrogen compound metabolic process;cellular process;death;macromolecule metabolic process;metabolic process;nitrogen compound metabolic process;nucleobase-containing compound metabolic process;primary metabolic process;regulation of cell cycle;regulation of mitotic cell cycle;response to stimulus…	cell part;macromolecular complex;PcG protein complex;protein complex	Adherens junction;Circadian rhythm - plant;Measles;Ribosome biogenesis in eukaryotes;Tight junction;Wnt signaling pathway	Acetylation;Apoptosis;ATP-binding;Cellcycle;Completeproteome;Kinase;Nucleotide-binding;Phosphoprotein;Referenceproteome;Serine/threonine-proteinkinase;Transcription;Transcriptionregulation;Transferase;Wntsignalingpathway	Ksr1-CK2 complex;Ksr1-CK2-MEK-14-3-3 complex, PDGF treated	Pkinase	+	+	+				3.13808	-3.12545	3.07649	-3.19596	3.82878	-3.41479	0.119258	-0.0603914	0.0575053	0.0286074	0.711578	0.244549	O54833;Q545V8	Casein kinase II subunit alpha	Csnk2a2
							+	+	+				1.71306	-4.08238	1.2134	-3.17646	1.20172	-3.28847	0.827001	-0.160596	1.25561	-0.168991	0.031638	0.00924253	E9PX61		Gm15800
binding;catalytic activity;cation binding;chromatin binding;DNA (cytosine-5-)-methyltransferase activity;DNA (cytosine-5-)-methyltransferase activity, acting on CpG substrates;DNA binding;DNA-methyltransferase activity;ion binding;metal ion binding;methyltransferase activity;nucleic acid binding;S-adenosylmethionine-dependent methyltransferase activity;sequence-specific DNA binding;transferase ac…	amine metabolic process;biological regulation;biosynthetic process;cellular amino acid metabolic process;cellular aromatic compound metabolic process;cellular component organization;cellular ketone metabolic process;cellular metabolic process;cellular nitrogen compound metabolic process;cellular process;chromatin modification;chromatin organization;chromosome organization;DNA metabolic process;DN…	cell part;cytoplasm	Cysteine and methionine metabolism	3D-structure;Alternativepromoterusage;Chromatinregulator;Completeproteome;Cytoplasm;DNA-binding;Metal-binding;Methyltransferase;Nucleus;Phosphoprotein;Referenceproteome;Repressor;S-adenosyl-L-methionine;Transcription;Transcriptionregulation;Transferase;Ublconjugation;Zinc;Zinc-finger		DNA_methylase;PWWP	+	+	+				1.95512	-2.96473	3.20799	-3.61473	2.00621	-3.14114	0.0336385	-0.0137458	0.0265333	-0.0131102	0.603054	0.141015	O88508;O88508-2	DNA (cytosine-5)-methyltransferase 3A	Dnmt3a
acetyltransferase activity;catalytic activity;enzyme regulator activity;histone acetyltransferase activity;kinase regulator activity;lysine N-acetyltransferase activity;N-acetyltransferase activity;N-acyltransferase activity;phosphorylase kinase regulator activity;protein kinase regulator activity;transferase activity;transferase activity, transferring acyl groups;transferase activity, transferri…	biological regulation;biosynthetic process;cellular metabolic process;cellular nitrogen compound metabolic process;cellular process;macromolecule metabolic process;metabolic process;nitrogen compound metabolic process;nucleobase-containing compound metabolic process;primary metabolic process;RNA metabolic process	cell part;cytoplasm;DNA-directed RNA polymerase II, holoenzyme;macromolecular complex;protein complex;transcription elongation factor complex		Completeproteome;Cytoplasm;Nucleus;Referenceproteome;Transcription;Transcriptionregulation		PAXNEB	+	+	+				2.99058	-2.19891	3.23998	-2.39663	3.47613	-2.61719	0.18838	-0.0566568	1.02543	-0.167295	1.26486	-0.220976	Q9ER73;A2A414	Elongator complex protein 4	Elp4
adenyl nucleotide binding;adenyl ribonucleotide binding;ATP binding;binding;catalytic activity;cation binding;enzyme regulator activity;GTPase regulator activity;ion binding;kinase activity;lipid binding;metal ion binding;nucleoside-triphosphatase regulator activity;nucleotide binding;phospholipid binding;phosphotransferase activity, alcohol group as acceptor;protein kinase activity;protein serin…	biological regulation;cellular component organization;cellular process;cytoskeleton organization;establishment of localization;organelle organization;response to stimulus;signal transduction	cell part;cytoplasm		Alternativesplicing;ATP-binding;Coiledcoil;Completeproteome;Cytoplasm;Kinase;Metal-binding;Nucleotide-binding;Phosphoprotein;Referenceproteome;Serine/threonine-proteinkinase;Transferase;Zinc;Zinc-finger		C1_1;CNH;DMPK_coil;Pkinase;Pkinase_C	+	+	+				1.78013	-2.35548	1.73784	-2.22087	1.32943	-1.95188	0.0771087	-0.026475	0.706463	-0.177114	0.382589	-0.106044	Q3UU96;D3YYN8;E9PVY0;H7BX44;Q3UU96-2;F6Q5A5	Serine/threonine-protein kinase MRCK alpha	Cdc42bpa
		cell part;cytoplasm;membrane;plasma membrane		Celljunction;Cellmembrane;Completeproteome;Cytoplasm;Leucine-richrepeat;Membrane;Phosphoprotein;Postsynapticcellmembrane;Referenceproteome;Repeat;Synapse		LRR_1;LRR_4;PDZ	+		+				1.51374	-3.21501	-4.34294e-08	0	1.16966	-3.06989	0.108359	0.0584407	0.303569	-0.147035	0.277276	-0.162139	Q80TE7;E9Q6L9;B9EHV0	Leucine-rich repeat-containing protein 7	Lrrc7
acetyltransferase activity;binding;catalytic activity;chromatin binding;H4 histone acetyltransferase activity;histone acetyltransferase activity;histone acetyltransferase activity (H4-K16 specific);histone acetyltransferase activity (H4-K5 specific);histone acetyltransferase activity (H4-K8 specific);lysine N-acetyltransferase activity;N-acetyltransferase activity;N-acyltransferase activity;prote…	biological regulation;cell cycle;cellular component organization;cellular metabolic process;cellular process;chromatin modification;chromatin organization;chromosome organization;histone modification;macromolecule metabolic process;macromolecule modification;metabolic process;organelle organization;peptidyl-amino acid modification;primary metabolic process;protein acylation;protein metabolic proc…	cell body;cell part;chromatin remodeling complex;cytoplasm;histone methyltransferase complex;intracellular membrane-bounded organelle;intracellular organelle;macromolecular complex;mitochondrion;neuronal cell body;organelle;protein complex		3D-structure;Acetylation;Autocatalyticcleavage;Cellcycle;Chromatinregulator;Completeproteome;Cytoplasm;Glycoprotein;Isopeptidebond;Kelchrepeat;Nucleus;Phosphoprotein;Referenceproteome;Repeat;Ublconjugation		Kelch_1;Kelch_2		+	+				0.811808	-1.63451	1.43492	-1.75115	2.41302	-5.60969	0.305985	-0.0920038	0.103055	-0.0331278	0.134915	-0.0457783	Q61191;B1AUX2	Host cell factor 1;HCF N-terminal chain 1;HCF N-terminal chain 2;HCF N-terminal chain 3;HCF N-terminal chain 4;HCF N-terminal chain 5;HCF N-terminal chain 6;HCF C-terminal chain 1;HCF C-terminal chain 2;HCF C-terminal chain 3;HCF C-terminal chain 4;HCF C-terminal chain 5;HCF C-terminal chain 6	Hcfc1	+	+	+
binding;cation binding;DNA binding;ion binding;metal ion binding;nucleic acid binding;transition metal ion binding;zinc ion binding	biological regulation;biosynthetic process;cellular metabolic process;cellular nitrogen compound metabolic process;cellular process;macromolecule metabolic process;metabolic process;nitrogen compound metabolic process;nucleobase-containing compound metabolic process;primary metabolic process;RNA metabolic process	cell part;intracellular membrane-bounded organelle;intracellular organelle;nucleus;organelle		Alternativesplicing;Completeproteome;DNA-binding;Metal-binding;Nucleus;Phosphoprotein;Referenceproteome;Repeat;Transcription;Transcriptionregulation;Zinc;Zinc-finger		zf-C2H2		+	+				-4.34294e-08	0	2.29881	-2.17344	3.44943	-5.06323	0.0198955	0.044241	0.596192	0.828304	0.011578	-0.0289826	Q6NXK2;Q6NXK2-2	Zinc finger protein 532	Znf532
actin binding;binding;cytoskeletal protein binding;identical protein binding;lipid binding;microtubule binding;phosphatidylinositol binding;phospholipid binding;protein binding;protein dimerization activity;protein homodimerization activity;tubulin binding	biological regulation;biosynthetic process;cell motility;cellular component assembly;cellular component movement;cellular component organization;cellular membrane organization;cellular metabolic process;cellular nitrogen compound metabolic process;cellular process;cytoskeleton organization;DNA metabolic process;DNA replication;locomotion;macromolecule metabolic process;membrane organization;metab…	cell part;cell projection;cytoplasmic membrane-bounded vesicle;cytosol;endoplasmic reticulum;Golgi apparatus;intracellular membrane-bounded organelle;intracellular organelle;membrane;organelle;plasma membrane;vesicle		Alternativesplicing;Cellmembrane;Cellprojection;Coiledcoil;Completeproteome;Cytoplasm;Cytoplasmicvesicle;DNAreplication;Membrane;Neurogenesis;Phosphoprotein;Referenceproteome		HOOK		+	+				1.13993	-1.39895	3.241	-3.65533	2.54697	-4.37579	0.85236	0.0917315	0.473575	0.0523825	0.418097	-0.113961	Q5SNZ0;Q5SNZ0-2;Q5SNZ0-3	Girdin	Ccdc88a			+
binding;cation binding;ion binding;K63-linked polyubiquitin binding;metal ion binding;polyubiquitin binding;protein binding;small conjugating protein binding;transition metal ion binding;ubiquitin binding;zinc ion binding	anatomical structure development;biological regulation;developmental process;regulation of protein modification process	cell part;cytosol;nucleoplasm	Leishmaniasis;MAPK signaling pathway;Measles;NOD-like receptor signaling pathway;Osteoclast differentiation;Toll-like receptor signaling pathway;Toxoplasmosis	3D-structure;Coiledcoil;Completeproteome;Cytoplasm;Metal-binding;Nucleus;Phosphoprotein;Referenceproteome;Ublconjugation;Zinc;Zinc-finger		CUE		+	+				-4.34294e-08	0	3.61256	-4.31202	2.10228	-3.89326	-4.34294e-08	0	-4.34294e-08	0	-4.34294e-08	0	Q99K90;D3Z216	TGF-beta-activated kinase 1 and MAP3K7-binding protein 2	Tab2
1-alkyl-2-acetylglycerophosphocholine esterase activity;carboxylic ester hydrolase activity;catalytic activity;hydrolase activity;hydrolase activity, acting on ester bonds	anatomical structure development;biological regulation;catabolic process;cellular component movement;cellular process;developmental process;lipid metabolic process;metabolic process;multicellular organismal process;primary metabolic process	cell part;cytoplasm;cytosol;intracellular non-membrane-bounded organelle;intracellular organelle;membrane;nucleolus;organelle;plasma membrane	Ether lipid metabolism	Acetylation;Completeproteome;Cytoplasm;Directproteinsequencing;Hydrolase;Lipiddegradation;Lipidmetabolism;Phosphoprotein;Referenceproteome				+	+				0.70045	-2.68311	1.03443	-3.00322	0.968681	-2.87643	0.950354	-0.20241	0.434779	-0.120642	1.19076	-0.249783	Q61206;F8WIW7	Platelet-activating factor acetylhydrolase IB subunit beta	Pafah1b2
binding;polyubiquitin binding;proteasome binding;protein binding;protein complex binding;ribonucleoprotein binding;ribosome binding;small conjugating protein binding;ubiquitin binding	anatomical structure development;biological regulation;catabolic process;cell death;cell differentiation;cellular component assembly;cellular component organization;cellular localization;cellular metabolic process;cellular process;chromatin modification;chromatin organization;chromosome organization;death;developmental process;embryo development;establishment of localization;immune system process…	cell part;intracellular membrane-bounded organelle;intracellular organelle;macromolecular complex;nucleus;organelle;protein complex		Acetylation;Apoptosis;Chaperone;Chromatinregulator;Completeproteome;Cytoplasm;Differentiation;Immunity;Nucleus;Phosphoprotein;Referenceproteome;Repeat;Spermatogenesis;Transport		DUF3538;ubiquitin		+	+				0.5054	-1.5818	1.61438	-3.33067	1.09218	-2.81515	1.73812	-0.310406	2.01456	-0.280387	0.406095	-0.10168	Q9Z1R2;Q3UF95;G3UYQ2;G3UZT6;Q3TDL4	Large proline-rich protein BAG6	Bag6
ARF guanyl-nucleotide exchange factor activity;binding;enzyme regulator activity;GTPase regulator activity;guanyl-nucleotide exchange factor activity;lipid binding;nucleoside-triphosphatase regulator activity;phospholipid binding;small GTPase regulator activity	biological regulation;cellular component organization;cellular process;cytoskeleton organization;organelle organization	cell part;intracellular membrane-bounded organelle;intracellular organelle;nucleus;organelle	Endocytosis	Alternativesplicing;Coiledcoil;Completeproteome;Guanine-nucleotidereleasingfactor;Phosphoprotein;Referenceproteome		Sec7		+	+				1.63717	-2.33958	1.58099	-2.03421	1.96681	-2.68333	0.000897188	-0.000325203	1.11661	-0.199691	0.394182	-0.151473	E9PUA3;Q8R0S2;Q8R0S2-2	IQ motif and SEC7 domain-containing protein 1	Iqsec1
	biological regulation;establishment of localization;transport	cell part;intracellular membrane-bounded organelle;intracellular organelle;membrane;mitochondrion;organelle		Alternativesplicing;Apoptosis;Completeproteome;Membrane;Mitochondrion;Mitochondrioninnermembrane;Phosphoprotein;Referenceproteome;Repeat;Transmembrane;Transmembranehelix;Transport		Mito_carr		+	+				1.08998	-2.55124	1.2402	-2.86381	1.04739	-2.47679	0.672768	-0.137551	1.61356	-0.217582	0.573978	-0.126538	Q791T5;Q791T5-2	Mitochondrial carrier homolog 1	Mtch1
		cell part;cytoplasm;intracellular membrane-bounded organelle;intracellular organelle;nucleus;organelle	NOD-like receptor signaling pathway;Plant-pathogen interaction	Acetylation;Completeproteome;Cytoplasm;Nucleus;Phosphoprotein;Referenceproteome;Repeat;TPRrepeat;Ublconjugationpathway		CS;SGS;TPR_2		+	+				1.3145	-1.91088	2.57072	-3.48365	2.1812	-2.36195	0.0232025	0.00799465	0.145288	0.0425096	0.251521	0.101099	Q9CX34	Suppressor of G2 allele of SKP1 homolog	Sugt1
catalytic activity;hydrolase activity;hydrolase activity, acting on ester bonds;MAP kinase phosphatase activity;phosphatase activity;phosphoprotein phosphatase activity;phosphoric ester hydrolase activity;protein tyrosine phosphatase activity;protein tyrosine/serine/threonine phosphatase activity	biological regulation;cellular metabolic process;cellular process;macromolecule metabolic process;macromolecule modification;metabolic process;phosphorus metabolic process;primary metabolic process;protein dephosphorylation;protein metabolic process;protein modification process;regulation of cell cycle;regulation of mitotic cell cycle	cell part;cytosol;nucleoplasm	MAPK signaling pathway	Completeproteome;Directproteinsequencing;Hydrolase;Nucleus;Proteinphosphatase;Referenceproteome		DSPc		+	+				1.57442	-2.28479	1.53364	-2.28507	1.58622	-2.29005	2.91118	-0.277827	0.0250669	-0.0121899	0.273943	0.114291	Q9D7X3;B1AQF3;B1AQF4;H3BKL8;Q3V2Y9	Dual specificity protein phosphatase 3	Dusp3
binding;DNA binding;nucleic acid binding	cellular component assembly;cellular component organization;cellular macromolecular complex assembly;cellular process;chromatin organization;chromosome organization;macromolecular complex assembly;organelle organization	cell part;intracellular membrane-bounded organelle;intracellular organelle;macromolecular complex;nucleosome;nucleus;organelle	Systemic lupus erythematosus	3D-structure;Acetylation;Chromosome;Citrullination;Completeproteome;DNA-binding;Isopeptidebond;Methylation;Nucleosomecore;Nucleus;Phosphoprotein;Referenceproteome;Ublconjugation		Histone		+	+			+	0.521575	-1.98222	1.71586	-2.68325	1.29069	-2.27779	0.129878	-0.209028	0.20234	0.40526	3.51011	2.14805	P22752;Q8CGP5;Q8BFU2;Q8CGP6;A3KPD0;B2RVF0;A2AB79;Q8CGP7;Q8CGP4	Histone H2A type 1;Histone H2A type 1-F;Histone H2A type 3;Histone H2A type 1-H;Histone H2A;Histone H2A type 1-K	Hist1h2ab;Hist1h2af;Hist3h2a;Hist1h2ah;Hist1h2ad;Hist1h2ak;Hist1h2aa
	biological regulation;regulation of organelle organization	cell part;cell projection;endosome;Golgi apparatus;intracellular membrane-bounded organelle;intracellular organelle;membrane;neuron projection;organelle;site of polarized growth;vesicle		Cellprojection;Coiledcoil;Completeproteome;Cytoplasm;Endosome;Golgiapparatus;Lipoprotein;Membrane;Palmitate;Phosphoprotein;Referenceproteome;Ublconjugation		Stathmin		+	+				1.16744	-2.23144	1.86568	-2.33231	1.51654	-2.18925	0.119705	-0.104672	0.0640999	0.0513406	0.228057	-0.160302	P55821;Q545S4;Q9CZ46	Stathmin-2;Stathmin	Stmn2
binding;carbohydrate binding;endopeptidase inhibitor activity;endopeptidase regulator activity;enzyme inhibitor activity;enzyme regulator activity;glycosaminoglycan binding;heparin binding;metalloendopeptidase inhibitor activity;metalloenzyme inhibitor activity;metalloenzyme regulator activity;pattern binding;peptidase inhibitor activity;peptidase regulator activity;polysaccharide binding	detection of stimulus;response to abiotic stimulus;response to external stimulus;response to stimulus;response to stress	cell part;cytoplasm		3D-structure;Acetylation;Completeproteome;Cytoplasm;Directproteinsequencing;Heparin-binding;Inflammatoryresponse;Metalloenzymeinhibitor;Metalloproteaseinhibitor;Proteaseinhibitor;Referenceproteome;Repeat		Latexin		+	+				-4.34294e-08	0	3.00397	-2.97923	1.15127	-2.1243	0.495376	-1.03424	0.580177	-1.17138	0.50429	-1.04016	P70202;Q14BZ3	Latexin	Lxn
binding;calcium ion binding;cation binding;ion binding;metal ion binding;transition metal ion binding;zinc ion binding		cell part;cytoplasm;macromolecular complex;membrane;plasma membrane;protein complex;synapse		Alternativesplicing;Celljunction;Cellmembrane;Coiledcoil;Completeproteome;Cytoplasm;Membrane;Metal-binding;Phosphoprotein;Referenceproteome;Synapse;Zinc;Zinc-finger	Brain-derived dystrobrevin-syntrophin complex;Kif5a-Dtnb-Dtna complex;Muscle-derived dystrobrevin-syntrophin complex	efhand_1;efhand_2;ZZ		+	+				1.42368	-1.96079	1.67054	-2.26392	1.31506	-1.97749	0.51558	0.147494	0.0332003	0.00986385	0.102942	-0.0847058	Q9D2N4;Q8CFR5;G5E8S4;G5E8S5;Q9D2N4-2;Q3UHP1;E9QJX4;Q9D2N4-4;Q9D2N4-3;Q9D2N4-7	Dystrobrevin alpha;Dystrobrevin	Dtna
binding;catalytic activity;GTP binding;GTPase activity;guanyl nucleotide binding;guanyl ribonucleotide binding;hydrolase activity;hydrolase activity, acting on acid anhydrides;hydrolase activity, acting on acid anhydrides, in phosphorus-containing anhydrides;nucleoside-triphosphatase activity;nucleotide binding;purine nucleotide binding;purine ribonucleoside triphosphate binding;purine ribonucleo…	anatomical structure formation involved in morphogenesis;anatomical structure morphogenesis;biological regulation;cellular component organization;cellular localization;cellular membrane organization;cellular process;developmental process;establishment of localization;localization;membrane fusion;membrane organization;mitochondrion organization;organelle fusion;organelle localization;organelle org…	cell part;cytoskeleton;cytosol;intracellular non-membrane-bounded organelle;intracellular organelle;organelle		Alternativesplicing;Coiledcoil;Completeproteome;Developmentalprotein;Directproteinsequencing;GTP-binding;Hydrolase;Membrane;Mitochondrion;Mitochondrionoutermembrane;Nucleotide-binding;Referenceproteome;Transmembrane;Transmembranehelix		Dynamin_N;Fzo_mitofusin		+	+				0.920457	-1.51769	2.32831	-2.15912	1.7824	-1.82157	0.843566	-0.217376	0.811634	-0.176576	0.181442	0.0772014	Q80U63;Q80U63-2	Mitofusin-2	Mfn2
	localization	cell part;cell projection;cytoplasmic membrane-bounded vesicle;endoplasmic reticulum;endosome;intracellular membrane-bounded organelle;intracellular organelle;membrane;neuron projection;organelle;plasma membrane;vesicle		3D-structure;Alternativesplicing;Celljunction;Cellmembrane;Completeproteome;Cytoplasmicvesicle;Endoplasmicreticulum;Lipoprotein;Membrane;Palmitate;Phosphoprotein;Postsynapticcellmembrane;Referenceproteome;Repeat;Synapse	Ng2-Grip1-Glur2 complex	PDZ		+	+				1.65845	-0.484537	3.90602	-1.84071	2.47218	-1.58613	0.16354	0.040163	0.219848	-0.0599575	0.0746887	-0.0227466	Q925T6;D3Z6T4;D3YZL8;Q6GQT7;Q925T6-3;Q925T6-2;H7BX90;H7BX09;D3YWY4;Q6X4T6;D3Z066;D3Z6R6;Q925T6-4	Glutamate receptor-interacting protein 1	Grip1
adenyl nucleotide binding;adenyl ribonucleotide binding;ATP binding;binding;catalytic activity;kinase activity;MAP kinase activity;molecular transducer activity;nucleotide binding;phosphotransferase activity, alcohol group as acceptor;protein kinase activity;protein serine/threonine kinase activity;purine nucleotide binding;purine ribonucleoside triphosphate binding;purine ribonucleotide binding;…	biological regulation;cellular metabolic process;cellular process;macromolecule metabolic process;macromolecule modification;metabolic process;phosphorus metabolic process;primary metabolic process;protein metabolic process;protein modification process;protein phosphorylation;regulation of DNA metabolic process;regulation of protein modification process;response to chemical stimulus;response to e…	cell part;intracellular membrane-bounded organelle;intracellular organelle;nucleus;organelle		ATP-binding;Completeproteome;Kinase;Nucleotide-binding;Phosphoprotein;Referenceproteome;Serine/threonine-proteinkinase;Transferase;Ublconjugation		Pkinase			+				-4.34294e-08	0	-4.34294e-08	0	3.38507	-6.13917	-4.34294e-08	0	-4.34294e-08	0	-4.34294e-08	0	Q80Y86	Mitogen-activated protein kinase 15	Mapk15
		cell part;intracellular membrane-bounded organelle;intracellular organelle;membrane;nucleus;organelle		Cellmembrane;Cellprojection;Coiledcoil;Completeproteome;Cytoplasm;Endoplasmicreticulum;Membrane;Nucleus;Referenceproteome					+				-4.34294e-08	0	-4.34294e-08	0	3.22934	-5.94954	-4.34294e-08	0	-4.34294e-08	0	-4.34294e-08	0	Q80TS7	Dendrin	Ddn
		cell part		Completeproteome;Membrane;Phosphoprotein;Referenceproteome;Transmembrane;Transmembranehelix					+				1.82868	-2.22766	1.49472	-1.51694	2.51838	-5.77751	0.0487355	-0.0207419	0.0509971	-0.0246677	1.64107	-0.48935	Q80X80;G5E8D9;E9Q6K0;E9PZE4	C2 domain-containing protein 2-like	C2cd2l
ARF guanyl-nucleotide exchange factor activity;binding;enzyme regulator activity;GTPase regulator activity;guanyl-nucleotide exchange factor activity;lipid binding;nucleoside-triphosphatase regulator activity;phospholipid binding;small GTPase regulator activity	biological regulation;cellular component organization;cellular process;cytoskeleton organization;organelle organization	cell part;cytoplasm;intracellular membrane-bounded organelle;intracellular organelle;membrane;nucleus;organelle;synapse	Endocytosis	Coiledcoil;Completeproteome;Cytoplasm;Phosphoprotein;Referenceproteome		Sec7			+				-4.34294e-08	0	-4.34294e-08	0	2.77111	-4.59577	-4.34294e-08	0	-4.34294e-08	0	-4.34294e-08	0	Q3TES0;Q3UHJ6	IQ motif and SEC7 domain-containing protein 3	Iqsec3
	anatomical structure morphogenesis;biological regulation;cellular component morphogenesis;cellular component organization;cellular process;developmental process;response to stimulus;signal transduction			Alternativesplicing;Completeproteome;Phosphoprotein;Referenceproteome					+				-4.34294e-08	0	-4.34294e-08	0	2.94583	-4.281	-4.34294e-08	0	-4.34294e-08	0	-4.34294e-08	0	Q6PFX7;Q6PFX7-2;E9PXJ0;Q6PFX7-3	Neuronal tyrosine-phosphorylated phosphoinositide-3-kinase adapter 1	Nyap1
adrenergic receptor binding;beta-1 adrenergic receptor binding;binding;enzyme binding;G-protein-coupled receptor binding;molecular transducer activity;PDZ domain binding;phosphatase binding;protein binding;protein complex scaffold;protein domain specific binding;receptor binding;receptor signaling complex scaffold activity;signal transducer activity;structural molecule activity	anatomical structure development;biological regulation;cell development;cellular component assembly;cellular component organization;cellular localization;cellular membrane organization;cellular process;developmental process;localization;macromolecular complex assembly;membrane organization;protein complex assembly;regulation of cell cycle;regulation of transport;response to stimulus;signal transd…	cell part;intracellular membrane-bounded organelle;intracellular organelle;membrane;nucleus;organelle;plasma membrane	Tight junction	Alternativesplicing;Celljunction;Cellmembrane;Completeproteome;Membrane;Phosphoprotein;Referenceproteome;Repeat;Synapse;Synaptosome	ActRIIA-ActRIB-Smad3-Arip1 complex	Guanylate_kin;PDZ;WW			+				-4.34294e-08	0	-4.34294e-08	0	3.57014	-4.28044	0.284798	0.138198	0.266632	0.14229	0.292859	-0.198415	Q9WVQ1;E9PW17;Q9WVQ1-4;Q9WVQ1-2;Q9WVQ1-3	Membrane-associated guanylate kinase, WW and PDZ domain-containing protein 2	Magi2
adenyl nucleotide binding;adenyl ribonucleotide binding;ATP binding;binding;catalytic activity;cation binding;enzyme activator activity;enzyme regulator activity;GTPase activator activity;GTPase regulator activity;hydrolase activity;hydrolase activity, acting on acid anhydrides;hydrolase activity, acting on acid anhydrides, in phosphorus-containing anhydrides;ion binding;metal ion binding;motor a…	biological regulation;cellular process;response to stimulus;signal transduction	cell part;macromolecular complex;protein complex		Actin-binding;Alternativesplicing;ATP-binding;Coiledcoil;Completeproteome;GTPaseactivation;Membrane;Metal-binding;Motorprotein;Myosin;Nucleotide-binding;Phosphoprotein;Referenceproteome;Repeat;Transmembrane;Transmembranehelix;Zinc;Zinc-finger		IQ;Myosin_head;RA;RhoGAP			+				-4.34294e-08	0	-4.34294e-08	0	2.27001	-3.49443	0.501755	-0.124803	0.951486	-0.276824	0.548525	-0.170967	Q8C170;Q8C170-2;D3Z3A8	Unconventional myosin-IXa	Myo9a
	establishment of localization;protein transport;transport	cell part;cytoplasm;intracellular membrane-bounded organelle;intracellular organelle;nucleus;organelle		Completeproteome;Cytoplasm;Nucleus;Phosphoprotein;Proteintransport;Referenceproteome;Transport		NAC			+				-4.34294e-08	0	-4.34294e-08	0	2.34958	-3.4837	0.393336	-0.112846	0.657332	-0.157318	0.0754797	0.0304151	Q5SWP3	NAC-alpha domain-containing protein 1	Nacad	+	+	+
		cell part;cytoplasm;macromolecular complex;protein complex		Alternativesplicing;Coiledcoil;Completeproteome;Cytoplasm;Cytoskeleton;Directproteinsequencing;Leucine-richrepeat;Microtubule;Referenceproteome;Repeat	Tubulin polyglutamylase complex	LRR_4			+				-4.34294e-08	0	-4.34294e-08	0	2.23591	-3.44406	0.85319	-0.389152	0.278047	0.455034	0.172199	0.105207	D3YWN5;G5E8R5;Q91YK0;E9Q8C9;E9QM16;Q91YK0-2;D6RIL3;Q91YK0-3	Leucine-rich repeat-containing protein 49	Lrrc49
binding;cation binding;ion binding;metal ion binding;transition metal ion binding;zinc ion binding		cell part;intracellular		ANKrepeat;Completeproteome;Directproteinsequencing;Metal-binding;Phosphoprotein;Referenceproteome;Repeat;Zinc;Zinc-finger		Ank_2;DZR			+				0.666182	1.0083	0.621173	-0.563934	1.85122	-3.3749	-4.34294e-08	0	-4.34294e-08	0	-4.34294e-08	0	Q8C008;B7ZNV9;E9Q4Z6	Double zinc ribbon and ankyrin repeat-containing protein 1	Dzank1
binding;cytokine activity;identical protein binding;nucleic acid binding;protein binding;protein dimerization activity;protein homodimerization activity;receptor binding;RNA binding;tRNA binding	alcohol metabolic process;anatomical structure formation involved in morphogenesis;biological adhesion;biological regulation;biosynthetic process;carbohydrate metabolic process;cell adhesion;cell communication;cell death;cell motility;cell-cell signaling;cellular component movement;cellular metabolic process;cellular process;death;developmental process;immune system process;locomotion;macromolecu…	cell part;cell surface;cytoplasmic membrane-bounded vesicle;cytosol;endoplasmic reticulum;extracellular space;Golgi apparatus;intracellular membrane-bounded organelle;intracellular organelle;macromolecular complex;nucleus;organelle;protein complex;vesicle		Angiogenesis;Apoptosis;Carbohydratemetabolism;Celladhesion;Completeproteome;Cytokine;Cytoplasm;Cytoplasmicvesicle;Directproteinsequencing;Endoplasmicreticulum;Glucosemetabolism;Golgiapparatus;Inflammatoryresponse;Nucleus;Proteinbiosynthesis;Referenceproteome;RNA-binding;Secreted;tRNA-binding		tRNA_bind			+				-4.34294e-08	0	-4.34294e-08	0	2.69581	-3.30797	0.183609	0.0674353	0.121221	0.0413532	0.290071	-0.0972085	P31230;Q3UZG4	Aminoacyl tRNA synthase complex-interacting multifunctional protein 1;Endothelial monocyte-activating polypeptide 2	Aimp1
	biological regulation;biosynthetic process;cellular component organization;cellular metabolic process;cellular nitrogen compound metabolic process;cellular process;chromatin modification;chromatin organization;chromosome organization;DNA metabolic process;DNA repair;macromolecule metabolic process;metabolic process;nitrogen compound metabolic process;nucleobase-containing compound metabolic proce…	cell part;intracellular membrane-bounded organelle;intracellular organelle;nucleus;organelle		Alternativesplicing;Chromatinregulator;Completeproteome;DNAdamage;DNArepair;Glycoprotein;Nucleus;Phosphoprotein;Referenceproteome;Repressor;Transcription;Transcriptionregulation		ENT			+				-4.34294e-08	0	-4.34294e-08	0	2.86047	-3.3064	-4.34294e-08	0	-4.34294e-08	0	-4.34294e-08	0	Q8BMB0;Q8BMB0-2;Q8BMB0-3	Protein EMSY	Emsy
		cell part;cytoplasm;intracellular membrane-bounded organelle;intracellular organelle;membrane;nucleus;organelle;plasma membrane		Alternativesplicing;ANKrepeat;Celljunction;Cellmembrane;Cellprojection;Completeproteome;Cytoplasm;Membrane;Nucleus;Phosphoprotein;Postsynapticcellmembrane;Referenceproteome;Repeat;Synapse		Ank_2;PID;SAM_1			+				-4.34294e-08	0	-4.34294e-08	0	2.80181	-3.22431	0.0260463	-0.0178099	0.223184	-0.120153	0.151967	-0.0965314	Q8BIZ1;E9QPP5;Q8BIZ1-3;F7D2Z9;E9Q2H9;Q8BIZ1-5	Ankyrin repeat and sterile alpha motif domain-containing protein 1B	Anks1b
enzyme activator activity;enzyme regulator activity;GTPase activator activity;GTPase regulator activity;nucleoside-triphosphatase regulator activity	biological regulation;cellular component organization;cellular process;cytoskeleton organization;organelle organization;response to stimulus;signal transduction	cell part;cytoplasm;membrane;plasma membrane		Alternativesplicing;Celljunction;Cellmembrane;Coiledcoil;Completeproteome;Cytoplasm;Cytoskeleton;Directproteinsequencing;GTPaseactivation;Membrane;Phosphoprotein;Postsynapticcellmembrane;Referenceproteome;Synapse;Synaptosome;Ublconjugation		DUF3401;Rap_GAP			+				-4.34294e-08	0	0.68698	-1.71925	1.40606	-3.02413	0.193681	0.0789552	0.175542	-0.0738645	0.212723	-0.121026	Q8C0T5;Q8C0T5-2;Q4VBF8	Signal-induced proliferation-associated 1-like protein 1	Sipa1l1
	biological regulation;cell cycle;cellular process	cell body;cell part;Golgi apparatus;intracellular membrane-bounded organelle;intracellular non-membrane-bounded organelle;intracellular organelle;membrane;nucleolus;organelle		Cellcycle;Celljunction;Cellmembrane;Cellprojection;Coiledcoil;Completeproteome;Cytoplasm;Lipoprotein;Membrane;Myristate;Postsynapticcellmembrane;Referenceproteome;Synapse;Tumorsuppressor					+				-4.34294e-08	0	-4.34294e-08	0	2.83226	-2.89028	0.0501503	0.0248761	0.494303	-0.14914	0.360795	0.644276	P60853	Leucine zipper putative tumor suppressor 1	Lzts1
adenyl nucleotide binding;adenyl ribonucleotide binding;ATP binding;binding;nucleotide binding;purine nucleotide binding;purine ribonucleoside triphosphate binding;purine ribonucleotide binding;ribonucleotide binding	biological regulation;regulation of protein modification process	cell part;intracellular membrane-bounded organelle;intracellular organelle;membrane;nucleus;organelle;plasma membrane	Tight junction	Alternativesplicing;ATP-binding;Celljunction;Cellmembrane;Completeproteome;Membrane;Nucleotide-binding;Nucleus;Phosphoprotein;Referenceproteome;Repeat;Tightjunction		Guanylate_kin;PDZ;WW			+				-4.34294e-08	0	-4.34294e-08	0	2.47227	-2.62335	0.528376	-0.247879	0.0468471	0.0353427	0.710384	-0.293855	Q9EQJ9;G5E8T6;Q9EQJ9-2	Membrane-associated guanylate kinase, WW and PDZ domain-containing protein 3	Magi3
binding;catalytic activity;GTP binding;GTPase activity;guanyl nucleotide binding;guanyl ribonucleotide binding;hydrolase activity;hydrolase activity, acting on acid anhydrides;hydrolase activity, acting on acid anhydrides, in phosphorus-containing anhydrides;lipid binding;nucleoside-triphosphatase activity;nucleotide binding;phospholipid binding;purine nucleotide binding;purine ribonucleoside tri…	catabolic process;cellular component organization;cellular membrane organization;cellular metabolic process;cellular nitrogen compound metabolic process;cellular process;endocytosis;establishment of localization;heterocycle metabolic process;membrane invagination;membrane organization;metabolic process;nitrogen compound metabolic process;nucleobase-containing compound catabolic process;nucleobase…	cell part;cytoplasmic membrane-bounded vesicle;intracellular membrane-bounded organelle;intracellular organelle;macromolecular complex;membrane;midbody;nucleus;organelle;plasma membrane;protein complex;vesicle	Bacterial invasion of epithelial cells;Endocrine and other factor-regulated calcium reabsorption;Endocytosis;Fc gamma R-mediated phagocytosis	Acetylation;Alternativesplicing;Celljunction;Cellmembrane;Completeproteome;Cytoplasm;Cytoskeleton;Directproteinsequencing;Endocytosis;GTP-binding;Hydrolase;Membrane;Microtubule;Motorprotein;Nucleotide-binding;Phosphoprotein;Postsynapticcellmembrane;Referenceproteome;Synapse		Dynamin_M;Dynamin_N;GED;PH			+				0.832569	-2.34914	0.799194	-2.41145	0.975471	-2.58575	0.0240141	-0.00575972	0.930154	0.140525	0.722242	0.0659127	Q3TCR7;G3X9G4;P39054;Q3T9X3;F8WIV5	Dynamin-2	Dnm2
adenyl nucleotide binding;adenyl ribonucleotide binding;ATP binding;binding;catalytic activity;hydrolase activity;hydrolase activity, acting on acid anhydrides;hydrolase activity, acting on acid anhydrides, in phosphorus-containing anhydrides;microtubule motor activity;motor activity;nucleoside-triphosphatase activity;nucleotide binding;purine nucleotide binding;purine ribonucleoside triphosphate…	cellular component movement;cellular process	cell part;cell projection;cytoplasm;macromolecular complex;neuron projection;protein complex		Alternativesplicing;ATP-binding;Cellprojection;Coiledcoil;Completeproteome;Cytoplasm;Cytoskeleton;Microtubule;Motorprotein;Nucleotide-binding;Phosphoprotein;Referenceproteome;Repeat;WDrepeat		Kinesin;WD40			+				-4.34294e-08	0	-4.34294e-08	0	2.50067	-2.46792	0.418059	-0.109316	0.691835	-0.109908	1.59797	-0.259902	Q9QXL2;Q9QXL2-2;F8WGN6;Q9QXL2-3;Q9QXL2-4;F8WI86;E9Q0J5	Kinesin-like protein KIF21A	Kif21a
binding;cation binding;ion binding;metal ion binding;transition metal ion binding;zinc ion binding	cellular process;establishment of localization;Golgi vesicle transport;protein transport;transport;vesicle-mediated transport	cell part;macromolecular complex;protein complex		Proteintransport;Transport		Sec23_BS;Sec23_trunk;zf-Sec23_Sec24			+				-4.34294e-08	0	0.786001	-1.87984	1.11344	-2.34285	1.18027	-0.121714	0.0390846	-0.0146484	0.38911	-0.0726948	Q80ZX0;Q3U882;F6VJC5		Sec24b
acetyltransferase activity;binding;C-acetyltransferase activity;C-acyltransferase activity;catalytic activity;cofactor binding;glycine C-acetyltransferase activity;pyridoxal phosphate binding;transferase activity;transferase activity, transferring acyl groups;transferase activity, transferring acyl groups other than amino-acyl groups;vitamin B6 binding;vitamin binding	amine metabolic process;biosynthetic process;catabolic process;cellular amino acid metabolic process;cellular ketone metabolic process;cellular metabolic process;cellular nitrogen compound metabolic process;cellular process;metabolic process;nitrogen compound metabolic process;organic acid metabolic process;primary metabolic process;small molecule metabolic process	cell part;intracellular membrane-bounded organelle;intracellular organelle;mitochondrion;nucleus;organelle	Glycine, serine and threonine metabolism	Acyltransferase;Completeproteome;Mitochondrion;Nucleus;Pyridoxalphosphate;Referenceproteome;Transferase;Transitpeptide		Aminotran_1_2			+				-4.34294e-08	0	-4.34294e-08	0	2.38962	-2.18083	0.329835	-0.101274	0.0147865	-0.00854969	0.205416	-0.11787	O88986;E9PWY6	2-amino-3-ketobutyrate coenzyme A ligase, mitochondrial	Gcat
binding;double-stranded RNA binding;nucleic acid binding;RNA binding	establishment of localization;transport	cell part;endoplasmic reticulum;intracellular membrane-bounded organelle;intracellular non-membrane-bounded organelle;intracellular organelle;macromolecular complex;nucleolus;organelle;protein complex		3D-structure;Alternativesplicing;Completeproteome;Cytoplasm;Endoplasmicreticulum;Microtubule;Nucleus;Phosphoprotein;Referenceproteome;Repeat;RNA-binding;Transport		dsrm			+				0.089995	-0.14076	0.113394	0.064712	1.90926	-2.15833	0.126755	0.0324335	0.496977	-0.0834131	0.327292	-0.0772877	Q8CJ67;D3Z6D2;Q8CJ67-2;E2QRQ3;Q8CJ67-3	Double-stranded RNA-binding protein Staufen homolog 2	Stau2
enzyme regulator activity;GTPase regulator activity;guanyl-nucleotide exchange factor activity;nucleoside-triphosphatase regulator activity;Rab guanyl-nucleotide exchange factor activity;Ras guanyl-nucleotide exchange factor activity;small GTPase regulator activity	biological regulation;cellular metabolic process;cellular process;macromolecule metabolic process;macromolecule modification;metabolic process;phosphorus metabolic process;primary metabolic process;protein metabolic process;protein modification process;protein phosphorylation;regulation of cell cycle;regulation of protein modification process	cell part;cytoplasm		Alternativesplicing;Apoptosis;Completeproteome;Cytoplasm;Guanine-nucleotidereleasingfactor;Membrane;Phosphoprotein;Referenceproteome		dDENN;DENN;uDENN			+				0.0879704	-0.268217	0.612095	-1.0466	1.21555	-2.01989	0.162792	-0.030767	0.625989	-0.0997453	0.0464676	-0.0174131	Q80U28;A2AGR0;Q80U28-3;Q80U28-15;A2AGR1;A2AGQ6;A2AGQ3;A2AGQ8;A2AGQ4;E9QN47;Q80U28-2;A2AGQ2;A2AGQ7;A2AGQ9;A2AGQ5;E9Q9V8;Q80U28-11;Q80U28-8;Q80U28-7;Q80U28-6;Q80U28-5;Q80U28-4;Q80U28-10;E9QMB8;Q80U28-9;Q80U28-12;A6PWP8;Q80U28-13	MAP kinase-activating death domain protein	Madd
adenyl nucleotide binding;adenyl ribonucleotide binding;ATP binding;binding;catalytic activity;cation binding;ion binding;kinase activity;magnesium ion binding;metal ion binding;nucleotide binding;phosphotransferase activity, alcohol group as acceptor;protein kinase activity;protein serine/threonine kinase activity;purine nucleotide binding;purine ribonucleoside triphosphate binding;purine ribonu…		cell part;intracellular membrane-bounded organelle;intracellular organelle;nucleus;organelle		ATP-binding;Completeproteome;Kinase;Magnesium;Metal-binding;Nucleotide-binding;Nucleus;Phosphoprotein;Referenceproteome;Serine/threonine-proteinkinase;Transferase		Pkinase			+				0.633578	1.22521	1.66374	-0.485409	1.66245	-1.98939	0.114388	-0.0775657	0.347225	-0.136809	0.158284	0.107934	Q8VDU5;D3Z1F6	SNF-related serine/threonine-protein kinase	Snrk
binding;enzyme activator activity;enzyme regulator activity;GPI anchor binding;GTPase activator activity;GTPase regulator activity;lipid binding;nucleoside-triphosphatase regulator activity;phosphatidylinositol binding;phospholipid binding;Ras GTPase activator activity;Rho GTPase activator activity;small GTPase regulator activity	anatomical structure development;anatomical structure formation involved in morphogenesis;biological adhesion;biological regulation;cell adhesion;cell development;cell junction organization;cellular component assembly;cellular component organization;cellular process;cytoskeleton organization;developmental process;immune system process;organelle organization;regulation of protein modification proc…	cell part;cell projection;cytosol;endoplasmic reticulum;intracellular membrane-bounded organelle;intracellular organelle;neuron projection;organelle;site of polarized growth	Leukocyte transendothelial migration	Cellmembrane;Completeproteome;Directproteinsequencing;Disulfidebond;Glycoprotein;GPI-anchor;Immunoglobulindomain;Lipoprotein;Membrane;Polymorphism;Pyrrolidonecarboxylicacid;Referenceproteome;Signal		ig			+				-4.34294e-08	0	-4.34294e-08	0	1.63072	-1.95353	0.0368394	0.0190682	0.104722	-0.0498643	0.0720307	0.0488038	P01831	Thy-1 membrane glycoprotein	Thy1
enzyme activator activity;enzyme regulator activity;GTPase activator activity;GTPase regulator activity;molecular transducer activity;nucleoside-triphosphatase regulator activity;signal transducer activity	biological regulation;cellular process;response to stimulus;signal transduction	cell part;cytoplasm;cytosol;intracellular membrane-bounded organelle;intracellular organelle;macromolecular complex;membrane;nucleus;organelle;plasma membrane;protein complex		Completeproteome;Lipoprotein;Palmitate;Phosphoprotein;Referenceproteome;Signaltransductioninhibitor		DEP;G-gamma;RGS			+				-4.34294e-08	0	-4.34294e-08	0	1.27675	-1.94899	0.470635	0.111462	0.151517	0.0411911	0.23771	-0.0546908	Q80XD3;O54829	Regulator of G-protein signaling 7	Rgs7
adenyl nucleotide binding;adenyl ribonucleotide binding;ATP binding;ATPase activity;ATPase activity, coupled;beta-catenin binding;binding;catalytic activity;DNA binding;DNA helicase activity;DNA-dependent ATPase activity;helicase activity;histone binding;hydrolase activity;hydrolase activity, acting on acid anhydrides;hydrolase activity, acting on acid anhydrides, in phosphorus-containing anhydri…	biological regulation;biosynthetic process;cellular component organization;cellular metabolic process;cellular nitrogen compound metabolic process;cellular process;chromatin modification;chromatin organization;chromosome organization;developmental process;embryo development;macromolecule metabolic process;metabolic process;nitrogen compound metabolic process;nucleobase-containing compound metabol…	cell part;histone methyltransferase complex;macromolecular complex;protein complex	Wnt signaling pathway	Activator;Alternativesplicing;ATP-binding;Chromatinregulator;Completeproteome;DNA-binding;Helicase;Hydrolase;Isopeptidebond;Nucleotide-binding;Nucleus;Phosphoprotein;Referenceproteome;Repeat;Repressor;Transcription;Transcriptionregulation;Ublconjugation;Wntsignalingpathway		BRK;Chromo;Helicase_C;SNF2_N			+				0.806107	-2.01691	-4.34294e-08	0	1.55599	-1.90077	0.0496654	-0.0313711	0.0394879	0.0297747	0.0368527	0.0310855	Q09XV5;F7AL76	Chromodomain-helicase-DNA-binding protein 8	Chd8
	biological regulation;cellular component organization;cellular process;cytoskeleton organization;organelle organization;regulation of organelle organization	cell part;cell projection;cytoplasm;Golgi apparatus;intracellular membrane-bounded organelle;intracellular organelle;neuron projection;organelle;site of polarized growth		Cellprojection;Coiledcoil;Completeproteome;Golgiapparatus;Lipoprotein;Palmitate;Phosphoprotein;Referenceproteome		Stathmin			+				-4.34294e-08	0	0.602752	-1.2728	1.38578	-1.83789	0.110554	-0.121171	0.328607	-0.232175	0.921161	-0.450058	O70166;Q545T6;F6QGJ6	Stathmin-3;Stathmin	Stmn3
acetylglucosaminyltransferase activity;acetyltransferase activity;binding;catalytic activity;enzyme activator activity;enzyme regulator activity;H4 histone acetyltransferase activity;histone acetyltransferase activity;histone acetyltransferase activity (H4-K16 specific);histone acetyltransferase activity (H4-K5 specific);histone acetyltransferase activity (H4-K8 specific);lipid binding;lysine N-a…	biological regulation;carbohydrate metabolic process;cell communication;cellular component organization;cellular metabolic process;cellular process;chromatin modification;chromatin organization;chromosome organization;histone modification;macromolecule metabolic process;macromolecule modification;metabolic process;organelle organization;peptidyl-amino acid modification;primary metabolic process;p…	cell part;centrosome;cytosol;histone methyltransferase complex;intracellular non-membrane-bounded organelle;intracellular organelle;macromolecular complex;membrane;microtubule organizing center;organelle;plasma membrane;protein complex	Other types of O-glycan biosynthesis	Acetylation;Alternativesplicing;Cellmembrane;Chromatinregulator;Completeproteome;Cytoplasm;Directproteinsequencing;Glycosyltransferase;Lipid-binding;Membrane;Nucleus;Referenceproteome;Repeat;TPRrepeat;Transferase;Ublconjugation		TPR_1			+				1.98657	-0.510999	2.50901	-0.795733	2.30061	-1.69671	0.142487	-0.0439095	0.399513	-0.112498	0.27542	-0.0863981	Q8CGY8-2	UDP-N-acetylglucosamine--peptide N-acetylglucosaminyltransferase 110 kDa subunit	Ogt			+
catalytic activity;cysteine-type peptidase activity;endopeptidase inhibitor activity;endopeptidase regulator activity;enzyme inhibitor activity;enzyme regulator activity;hydrolase activity;hydrolase activity, acting on ester bonds;peptidase activity;peptidase activity, acting on L-amino acid peptides;peptidase inhibitor activity;peptidase regulator activity;thiolester hydrolase activity;ubiquitin…	biological regulation;catabolic process;cell communication;cell-cell signaling;cellular metabolic process;cellular process;macromolecule metabolic process;metabolic process;primary metabolic process;protein metabolic process;proteolysis;proteolysis involved in cellular protein catabolic process;signaling	cell part;cell surface;cytoplasmic membrane-bounded vesicle;intracellular membrane-bounded organelle;intracellular organelle;macromolecular complex;membrane;organelle;plasma membrane;proteasome complex;protein complex;synapse;vesicle		3D-structure;Acetylation;Cellmembrane;Completeproteome;Cytoplasm;Hydrolase;Membrane;Phosphoprotein;Protease;Proteasome;Referenceproteome;Thiolprotease;Ublconjugationpathway		UCH	+	+					2.46465	-2.10708	3.33277	-2.71604	1.32488	-1.7144	0.284077	-0.0768814	0.00923183	0.00308132	0.123593	0.0544672	Q9JMA1;E9PYI8	Ubiquitin carboxyl-terminal hydrolase 14;Ubiquitin carboxyl-terminal hydrolase	Usp14
binding;identical protein binding;protein binding;protein dimerization activity;protein homodimerization activity	cellular component assembly;cellular component organization;cellular localization;cellular process;localization;macromolecular complex assembly;protein complex assembly;protein complex biogenesis	cell part;membrane	Bacterial secretion system;Protein export	Completeproteome;Membrane;Mitochondrion;Mitochondrioninnermembrane;Referenceproteome;Transitpeptide;Transmembrane;Transmembranehelix		60KD_IMP	+	+					2.0324	-2.39457	3.47966	-3.38401	-4.34294e-08	0	0.368945	-0.115367	0.370973	-0.0829244	1.63597	-0.28483	Q8BGA9	Mitochondrial inner membrane protein OXA1L	Oxa1l
binding;calcium ion binding;catalytic activity;cation binding;hydrolase activity;hydrolase activity, acting on acid anhydrides;hydrolase activity, acting on acid anhydrides, in phosphorus-containing anhydrides;ion binding;metal ion binding;motor activity;nucleoside-triphosphatase activity;pyrophosphatase activity	anatomical structure development;anatomical structure morphogenesis;biological regulation;developmental process;multicellular organismal process;muscle contraction	cell part;intracellular non-membrane-bounded organelle;intracellular organelle;macromolecular complex;organelle;protein complex	Cardiac muscle contraction;Dilated cardiomyopathy;Hypertrophic cardiomyopathy (HCM)	Acetylation;Alternativesplicing;Completeproteome;Methylation;Motorprotein;Muscleprotein;Myosin;Referenceproteome;Repeat		EF_hand_4	+						3.00668	-3.3855	-4.34294e-08	0	1.06337	-1.8238	-4.34294e-08	0	-4.34294e-08	0	-4.34294e-08	0	P05977;P09542;Q545G5;E9PWG4;Q545T7;P05977-2	Myosin light chain 1/3, skeletal muscle isoform;Myosin light chain 3	Myl1;Myl3
catalytic activity;GTPase activity;hydrolase activity;hydrolase activity, acting on acid anhydrides;hydrolase activity, acting on acid anhydrides, in phosphorus-containing anhydrides;molecular transducer activity;nucleoside-triphosphatase activity;pyrophosphatase activity;signal transducer activity	biological regulation;cell proliferation;cellular process;response to stimulus;signal transduction	cell part;macromolecular complex;protein complex	Chemokine signaling pathway	Acetylation;Cellmembrane;Completeproteome;Lipoprotein;Membrane;Methylation;Phosphoprotein;Prenylation;Referenceproteome;Transducer	G protein complex (Btk, Gng2, Gnb1);G protein complex (Hdac4, Gnb1, Gng2);G protein complex (Hdac5, Gnb1, Gng2)	G-gamma	+						1.15738	-3.8699	0.434483	-1.78478	0.40129	-1.75895	0.373508	-0.248844	0.906473	0.348792	0.142017	-0.164768	P63213	Guanine nucleotide-binding protein G(I)/G(S)/G(O) subunit gamma-2	Gng2
binding;ribonucleoprotein binding;ribosome binding	catabolic process;cellular metabolic process;cellular process;establishment of localization;macromolecule metabolic process;metabolic process;primary metabolic process;protein metabolic process;protein transport;proteolysis;proteolysis involved in cellular protein catabolic process;transport	cell part;membrane	Phagosome;Protein export;Protein processing in endoplasmic reticulum;Vibrio cholerae infection	Acetylation;Completeproteome;Directproteinsequencing;Endoplasmicreticulum;Lipoprotein;Membrane;Palmitate;Phosphoprotein;Proteintransport;Referenceproteome;Translocation;Transmembrane;Transmembranehelix;Transport		Sec61_beta	+						2.08766	-3.67312	-4.34294e-08	0	-4.34294e-08	0	0.513971	0.300834	0.137105	0.0951953	0.885136	1.47359	Q9CQS8;A2AJM8;E9PW43	Protein transport protein Sec61 subunit beta	Sec61b;Gm10320
aldehyde dehydrogenase (NAD) activity;catalytic activity;oxidoreductase activity;oxidoreductase activity, acting on the aldehyde or oxo group of donors;oxidoreductase activity, acting on the aldehyde or oxo group of donors, NAD or NADP as acceptor	alcohol metabolic process;catabolic process;metabolic process;small molecule metabolic process	cell part;intracellular membrane-bounded organelle;intracellular organelle;mitochondrion;nucleus;organelle	Arginine and proline metabolism;Ascorbate and aldarate metabolism;beta-Alanine metabolism;Chloroalkane and chloroalkene degradation;Fatty acid metabolism;Glycerolipid metabolism;Glycolysis / Gluconeogenesis;Histidine metabolism;Limonene and pinene degradation;Lysine degradation;Pentose and glucuronate interconversions;Propanoate metabolism;Pyruvate metabolism;Tryptophan metabolism;Valine, leucine…	Completeproteome;Mitochondrion;NAD;Oxidoreductase;Referenceproteome;Transitpeptide		Aldedh	+						1.3256	-3.38082	-4.34294e-08	0	-4.34294e-08	0	0.236533	-0.100613	0.0884101	-0.0418315	0.341098	0.16243	Q9CZS1;B1AWX7	Aldehyde dehydrogenase X, mitochondrial	Aldh1b1
active transmembrane transporter activity;adenyl nucleotide binding;adenyl ribonucleotide binding;anion channel activity;anion transmembrane transporter activity;antiporter activity;ATP binding;binding;channel activity;chloride channel activity;gated channel activity;ion channel activity;ion transmembrane transporter activity;nucleotide binding;passive transmembrane transporter activity;PDZ domai…		cell part;endosome;Golgi apparatus;intracellular membrane-bounded organelle;intracellular organelle;membrane;organelle		Alternativesplicing;Antiport;ATP-binding;CBSdomain;Chloride;Completeproteome;Cytoplasmicvesicle;Endosome;Glycoprotein;Iontransport;Membrane;Nucleotide-binding;Referenceproteome;Repeat;Transmembrane;Transmembranehelix;Transport		CBS;Voltage_CLC	+						2.92304	-2.09093	-4.34294e-08	0	-4.34294e-08	0	0.0544897	0.0180058	0.42761	0.106357	0.278906	0.108667	P51791;Q8K4W8;Q790S0;P51791-2;Q3TF45;E9Q2I1	H(+)/Cl(-) exchange transporter 3	Clcn3
adenyl nucleotide binding;adenyl ribonucleotide binding;ATP binding;binding;calcium ion binding;catalytic activity;cation binding;GTP binding;GTPase activity;guanyl nucleotide binding;guanyl ribonucleotide binding;hydrolase activity;hydrolase activity, acting on acid anhydrides;hydrolase activity, acting on acid anhydrides, in phosphorus-containing anhydrides;ion binding;metal ion binding;nucleos…	catabolic process;cellular component assembly;cellular component organization;cellular metabolic process;cellular nitrogen compound metabolic process;cellular process;endosome transport;establishment of localization;heterocycle metabolic process;macromolecular complex assembly;metabolic process;nitrogen compound metabolic process;nucleobase-containing compound catabolic process;nucleobase-contain…	cell part;cytoplasmic membrane-bounded vesicle;intracellular membrane-bounded organelle;intracellular organelle;membrane;organelle;plasma membrane;vesicle	Endocytosis	Acetylation;ATP-binding;Calcium;Cellmembrane;Coiledcoil;Completeproteome;Cytoplasm;Directproteinsequencing;Endosome;Membrane;Metal-binding;Nucleotide-binding;Phosphoprotein;Referenceproteome		Dynamin_N	+						1.99489	-2.73516	-4.34294e-08	0	-4.34294e-08	0	0.195425	-0.0474911	1.25081	-0.160802	0.406074	0.103028	Q9QXY6	EH domain-containing protein 3	Ehd3
	biological regulation;biosynthetic process;cellular component organization;cellular metabolic process;cellular nitrogen compound metabolic process;cellular process;cytoskeleton organization;developmental process;macromolecule metabolic process;metabolic process;multicellular organismal development;multicellular organismal process;nitrogen compound metabolic process;nucleobase-containing compound …	cell part;centrosome;cytoplasm;intracellular membrane-bounded organelle;intracellular non-membrane-bounded organelle;intracellular organelle;microtubule organizing center;nucleus;organelle		Acetylation;Actin-binding;Activator;Celljunction;Completeproteome;Cytoplasm;Cytoskeleton;Developmentalprotein;Leucine-richrepeat;Nucleus;Phosphoprotein;Referenceproteome;Repeat;Transcription;Transcriptionregulation		Gelsolin;LRR_1;LRR_4	+						2.43428	-2.17563	-4.34294e-08	0	-4.34294e-08	0	0.386161	0.0716248	0.0554312	0.0155206	0.10562	-0.0372086	Q9JJ28	Protein flightless-1 homolog	Flii
	cellular metabolic process;cellular process;generation of precursor metabolites and energy;metabolic process	cell part;macromolecular complex;membrane;NADH dehydrogenase complex;protein complex	Alzheimer's disease;Huntington's disease;Oxidative phosphorylation;Parkinson's disease	Completeproteome;Directproteinsequencing;Electrontransport;Membrane;Mitochondrion;Mitochondrioninnermembrane;Referenceproteome;Respiratorychain;Transport	Respiratory chain complex I, mitochondrial	NDUFB10	+						3.85251	-3.46474	-4.34294e-08	0	-4.34294e-08	0	0.229296	0.113667	0.280973	-0.100433	0.104321	-0.0393271	Q9DCS9	NADH dehydrogenase [ubiquinone] 1 beta subcomplex subunit 10	Ndufb10
							+						2.68405	-2.15091	-4.34294e-08	0	-4.34294e-08	0	0.259873	0.151977	0.179414	0.103242	0.118154	-0.0896149	E9Q3G8		Nup153
adenyl nucleotide binding;adenyl ribonucleotide binding;aminoacyl-tRNA ligase activity;ATP binding;binding;catalytic activity;chromatin binding;enzyme binding;heat shock protein binding;identical protein binding;kinase binding;ligase activity;ligase activity, forming aminoacyl-tRNA and related compounds;ligase activity, forming carbon-oxygen bonds;mitogen-activated protein kinase binding;mRNA bin…	amine metabolic process;biological regulation;cell division;cellular amino acid metabolic process;cellular component organization;cellular ketone metabolic process;cellular metabolic process;cellular nitrogen compound metabolic process;cellular process;establishment of localization;macromolecule metabolic process;metabolic process;mitosis;nitrogen compound metabolic process;nuclear division;nucle…	cell part;intracellular non-membrane-bounded organelle;intracellular organelle;kinetochore;macromolecular complex;membrane;organelle;protein complex	MAPK signaling pathway - yeast;Pathways in cancer;RNA transport;Thyroid cancer	Acetylation;Cellcycle;Celldivision;Centromere;Chromosome;Coiledcoil;Completeproteome;Cytoplasm;Cytoskeleton;Kinetochore;Membrane;Mitosis;mRNAtransport;Nuclearporecomplex;Nucleus;Phosphoprotein;Proteintransport;Proto-oncogene;Referenceproteome;Translocation;Transport		TPR_MLP1_2	+						1.58552	-3.65967	-4.34294e-08	0	-4.34294e-08	0	0.818998	-0.200387	0.528364	-0.143079	0.593654	-0.125834	Q7M739;F6ZDS4;E9PZZ3	Nucleoprotein TPR	Tpr
adenyl nucleotide binding;adenyl ribonucleotide binding;ATP binding;binding;carbon-carbon lyase activity;carboxy-lyase activity;catalytic activity;diphosphomevalonate decarboxylase activity;lyase activity;nucleotide binding;purine nucleotide binding;purine ribonucleoside triphosphate binding;purine ribonucleotide binding;ribonucleotide binding	alcohol metabolic process;biological regulation;biosynthetic process;cellular lipid metabolic process;cellular metabolic process;cellular process;lipid metabolic process;metabolic process;primary metabolic process;small molecule metabolic process	cell part;cytosol	Terpenoid backbone biosynthesis	3D-structure;Acetylation;ATP-binding;Cholesterolbiosynthesis;Cholesterolmetabolism;Completeproteome;Lipidbiosynthesis;Lipidmetabolism;Lyase;Nucleotide-binding;Referenceproteome;Steroidbiosynthesis;Steroidmetabolism;Sterolbiosynthesis;Sterolmetabolism		GHMP_kinases_N	+						2.31932	-2.28721	-4.34294e-08	0	-4.34294e-08	0	0.589395	-0.108925	0.0425135	0.0117602	0.39943	-0.146698	Q99JF5;Q3UYC1	Diphosphomevalonate decarboxylase	Mvd
adenyl nucleotide binding;adenyl ribonucleotide binding;ATP binding;binding;catalytic activity;kinase activity;non-membrane spanning protein tyrosine kinase activity;nucleotide binding;phosphotransferase activity, alcohol group as acceptor;protein kinase activity;protein serine/threonine kinase activity;protein serine/threonine/tyrosine kinase activity;protein tyrosine kinase activity;purine nucl…	biological regulation;cellular metabolic process;cellular process;macromolecule metabolic process;macromolecule modification;metabolic process;peptidyl-amino acid modification;phosphorus metabolic process;primary metabolic process;protein metabolic process;protein modification process;protein phosphorylation;regulation of protein modification process;rhythmic process	cell part;macromolecular complex;ribonucleoprotein complex		ATP-binding;Completeproteome;Kinase;Nucleotide-binding;Nucleus;Phosphoprotein;Referenceproteome;Serine/threonine-proteinkinase;Transferase;Tyrosine-proteinkinase		Pkinase	+						3.77705	-1.67727	-4.34294e-08	0	-4.34294e-08	0	0.1174	0.0517468	0.0125095	-0.0049119	0.32603	-0.17275	Q61214;A1L341;A9C475;F6ZS07	Dual specificity tyrosine-phosphorylation-regulated kinase 1A	Dyrk1a
binding;calcium ion binding;cation binding;ion binding;metal ion binding	alcohol metabolic process;amine metabolic process;biological regulation;cell communication;cell-cell signaling;cellular aromatic compound metabolic process;cellular component organization;cellular metabolic process;cellular nitrogen compound metabolic process;cellular process;metabolic process;nitrogen compound metabolic process;signaling;small molecule metabolic process	cell body;cell part;Golgi apparatus;intracellular membrane-bounded organelle;intracellular organelle;mitochondrion;neuronal cell body;nucleus;organelle;site of polarized growth;synapse		Completeproteome;Cytoplasm;Directproteinsequencing;Phosphoprotein;Referenceproteome;Repeat		Synuclein	+						1.3103	-3.15	-4.34294e-08	0	-4.34294e-08	0	0.246546	0.195859	0.186869	0.140449	0.406866	-0.320311	Q91ZZ3	Beta-synuclein	Sncb
		cell part;cytoplasm;macromolecular complex;protein complex		Alternativesplicing;Completeproteome;Cytoplasm;Cytoskeleton;Isopeptidebond;Microtubule;Phosphoprotein;Referenceproteome;Ublconjugation		FHA		+					0.899846	-2.52839	1.34857	-3.51759	0.714037	-2.47407	0.0220308	0.014833	0.279034	-0.152116	0.40012	-0.242628	Q80U49	Centrosomal protein of 170 kDa protein B	Cep170b
ARF GTPase activator activity;binding;cation binding;DNA binding;enzyme activator activity;enzyme regulator activity;GTPase activator activity;GTPase regulator activity;ion binding;metal ion binding;nucleic acid binding;nucleoside-triphosphatase regulator activity;small GTPase regulator activity;transition metal ion binding;zinc ion binding	anatomical structure formation involved in morphogenesis;biological regulation;cellular component assembly;cellular component organization;cellular process;cytoskeleton organization;developmental process;establishment of localization;multicellular organismal development;multicellular organismal process;nucleus organization;organelle organization;transport	cell body;cell part;cell projection;cytoplasmic membrane-bounded vesicle;Golgi apparatus;intracellular membrane-bounded organelle;intracellular organelle;neuronal cell body;nucleus;organelle;vesicle		Alternativesplicing;Completeproteome;Cytoplasmicvesicle;Developmentalprotein;Differentiation;DNA-binding;Glycoprotein;Metal-binding;Nucleus;Phosphoprotein;Referenceproteome;Repeat;Spermatogenesis;Transport;Zinc;Zinc-finger		ArfGap		+					1.08683	-2.41198	1.0871	-2.37692	0.979978	-2.32989	0.16387	0.111363	0.26836	-0.133534	0.298478	-0.180692	Q8K2K6;Q8K2K6-3;Q8K2K6-1;Q8K2K6-2	Arf-GAP domain and FG repeat-containing protein 1	Agfg1
	biological regulation;cellular component organization;regulation of organelle organization	cell part;cell projection;cytoplasm;macromolecular complex;protein complex	Bacterial invasion of epithelial cells;Fc gamma R-mediated phagocytosis;Pathogenic Escherichia coli infection;Regulation of actin cytoskeleton;Shigellosis	Actin-binding;Cellprojection;Completeproteome;Cytoplasm;Cytoskeleton;Referenceproteome		P16-Arc		+					1.12031	-2.69061	1.18068	-2.72511	0.819423	-2.07768	0.0691744	-0.041759	0.0378401	-0.0204158	0.248884	-0.1416	Q9CPW4;Q3UA72	Actin-related protein 2/3 complex subunit 5	Arpc5
cation transmembrane transporter activity;ion transmembrane transporter activity;metal ion transmembrane transporter activity;substrate-specific transmembrane transporter activity;substrate-specific transporter activity;transmembrane transporter activity;transporter activity	establishment of localization;ion transport;transport	cell part		Completeproteome;Glycoprotein;Iontransport;Isopeptidebond;Membrane;Phosphoprotein;Referenceproteome;Transmembrane;Transmembranehelix;Transport;Ublconjugation;Zinc;Zinctransport		Zip		+					-4.34294e-08	0	1.17648	-2.06298	1.13039	-2.02713	1.06565	-1.32772	1.43547	-1.72201	1.57242	-1.84122	Q31125	Zinc transporter SLC39A7	Slc39a7
acid-amino acid ligase activity;catalytic activity;ligase activity;ligase activity, forming carbon-nitrogen bonds;small conjugating protein ligase activity;ubiquitin-protein ligase activity	cellular metabolic process;cellular process;macromolecule metabolic process;macromolecule modification;metabolic process;primary metabolic process;protein metabolic process;protein modification by small protein conjugation or removal;protein modification process	cell part;cytoplasm;intracellular membrane-bounded organelle;intracellular organelle;nucleus;organelle		Alternativesplicing;Coiledcoil;Completeproteome;Cytoplasm;Ligase;Referenceproteome;Repeat;Ublconjugationpathway		C2;HECT;WW		+					0.135772	-0.191992	2.0175	-2.12595	1.32162	-1.30426	0.640784	0.104403	0.0283194	0.0108166	0.743792	-0.123597	Q8K4P8;Q8K4P8-2;F6WD29	E3 ubiquitin-protein ligase HECW1	Hecw1
	cellular localization;cellular process;establishment of localization;localization;transport	cell part;macromolecular complex;protein complex		Completeproteome;Cytoplasm;Referenceproteome;Transport		ubiquitin		+					0.581902	-1.06119	1.38686	-2.0435	0.78821	-1.22391	0.658039	0.271822	0.00539185	-0.00450754	0.597488	-0.354916	P21126;Q3UK94	Ubiquitin-like protein 4A	Ubl4a;Ubl4
catalytic activity;hydrolase activity;hydrolase activity, acting on carbon-nitrogen (but not peptide) bonds;hydrolase activity, acting on carbon-nitrogen (but not peptide) bonds, in cyclic amides	catabolic process;cellular aromatic compound metabolic process;cellular metabolic process;cellular nitrogen compound metabolic process;cellular process;heterocycle metabolic process;metabolic process;nitrogen compound metabolic process;nucleobase-containing compound catabolic process;nucleobase-containing compound metabolic process;nucleobase-containing small molecule metabolic process;primary me…	cell body;cell part;cell projection;cytoplasm;intracellular non-membrane-bounded organelle;intracellular organelle;microtubule organizing center;neuron projection;neuronal cell body;organelle		3D-structure;Completeproteome;Cytoplasm;Cytoskeleton;Directproteinsequencing;Nitration;Phosphoprotein;Referenceproteome		Amidohydro_1		+					2.45918	-1.19865	3.5476	-1.63778	3.5759	-1.21512	0.24469	-0.118027	0.535001	0.229705	0.231447	0.131435	P97427	Dihydropyrimidinase-related protein 1	Crmp1
binding;caspase inhibitor activity;caspase regulator activity;cysteine-type endopeptidase inhibitor activity;DNA binding;endopeptidase inhibitor activity;endopeptidase regulator activity;enzyme activator activity;enzyme binding;enzyme inhibitor activity;enzyme regulator activity;GTPase activator activity;GTPase regulator activity;kinase binding;mitogen-activated protein kinase kinase binding;nucl…	biological regulation;biosynthetic process;catabolic process;cellular component assembly;cellular component organization;cellular membrane organization;cellular metabolic process;cellular nitrogen compound metabolic process;cellular process;cytoskeleton organization;detection of stimulus;endocytosis;establishment of localization;macromolecule metabolic process;macromolecule modification;membrane …	cell part;cell projection;cytoplasmic membrane-bounded vesicle;cytosol;intracellular membrane-bounded organelle;intracellular organelle;membrane;nucleus;organelle;plasma membrane;pseudopodium;vesicle	Chemokine signaling pathway;Endocytosis;MAPK signaling pathway;Phototransduction	Alternativesplicing;Cellmembrane;Cellprojection;Coatedpit;Completeproteome;Cytoplasm;Cytoplasmicvesicle;Membrane;Nucleus;Phosphoprotein;Proteintransport;Referenceproteome;Signaltransductioninhibitor;Transcription;Transcriptionregulation;Transport;Ublconjugation		Arrestin_C;Arrestin_N		+					0.0520692	0.045043	1.82883	-1.85457	0.570737	-0.939708	0.102236	0.0382032	0.293595	0.0934663	0.329949	-0.143791	Q8BWG8;Q8BWG8-2	Beta-arrestin-1	Arrb1
		cell part;cytoplasm		Coiledcoil;Completeproteome;Cytoplasm;Phosphoprotein;Referenceproteome				+					-4.34294e-08	0	3.23687	-2.15066	-4.34294e-08	0	0.598028	-0.211993	0.122142	-0.0367074	0.937102	0.22064	Q68FE6;G5E8A2	Protein FAM65A	Fam65a
catalytic activity;oxidoreductase activity		cell part;endoplasmic reticulum;intracellular membrane-bounded organelle;intracellular organelle;mitochondrion;organelle		Completeproteome;NADP;Oxidoreductase;Phosphoprotein;Referenceproteome		adh_short		+					-4.34294e-08	0	1.89061	-2.62694	-4.34294e-08	0	0.0373178	-0.0114064	0.903771	-0.183647	0.129438	0.0838547	Q9ERI6	Retinol dehydrogenase 14	Rdh14
binding;enzyme activator activity;enzyme regulator activity;GTPase activating protein binding;GTPase activator activity;GTPase regulator activity;guanyl-nucleotide exchange factor activity;nucleoside-triphosphatase regulator activity;protein binding	biological regulation;cellular component organization;cellular membrane organization;cellular process;endocytosis;establishment of localization;membrane invagination;membrane organization;regulation of transport;response to stimulus;signal transduction;transport;vesicle-mediated transport	cell part;cytosol;endosome;intracellular membrane-bounded organelle;intracellular organelle;membrane;organelle		Alternativesplicing;Completeproteome;Endocytosis;Endosome;GTPaseactivation;Guanine-nucleotidereleasingfactor;Membrane;Phosphoprotein;Referenceproteome		RasGAP;VPS9		+					-4.34294e-08	0	3.65265	-2.92724	-4.34294e-08	0	0.750101	-0.147257	0.00951048	0.00215244	0.188322	0.0732603	Q6PAR5;Q6PAR5-2;Q6PAR5-6;Q6PAR5-4;Q6PAR5-5	GTPase-activating protein and VPS9 domain-containing protein 1	Gapvd1
binding;cation binding;ion binding;metal ion binding;transition metal ion binding;zinc ion binding	biological regulation;cellular metabolic process;cellular process;macromolecule metabolic process;metabolic process;primary metabolic process;protein folding;protein metabolic process;regulation of cell cycle;regulation of organelle organization;regulation of protein modification process;response to stimulus;response to stress			Acetylation;Chaperone;Completeproteome;Metal-binding;Phosphoprotein;Referenceproteome;Repeat;Stressresponse;Zinc		CHORD;CS		+					-4.34294e-08	0	1.74058	-3.01874	-4.34294e-08	0	0.588905	-0.147514	0.175376	0.0388799	0.10162	0.0364022	Q9D1P4	Cysteine and histidine-rich domain-containing protein 1	Chordc1		+	+
								+					1.02607	-2.20521	1.09097	-2.32186	-4.34294e-08	0	0.0689484	-0.0144	0.10055	-0.0224175	0.00114732	0.000446796	Q91V89		Ppp2r5d
								+					-4.34294e-08	0	1.98705	-3.74653	-4.34294e-08	0	-4.34294e-08	0	-4.34294e-08	0	-4.34294e-08	0	E9Q6R7		Utrn
adenyl nucleotide binding;adenyl ribonucleotide binding;ATP binding;binding;calmodulin-dependent protein kinase activity;catalytic activity;kinase activity;nucleotide binding;phosphotransferase activity, alcohol group as acceptor;protein kinase activity;protein serine/threonine kinase activity;purine nucleotide binding;purine ribonucleoside triphosphate binding;purine ribonucleotide binding;ribon…	biological regulation;cellular metabolic process;cellular process;establishment of localization;ion transport;macromolecule metabolic process;macromolecule modification;metabolic process;multicellular organismal process;muscle contraction;peptidyl-amino acid modification;phosphorus metabolic process;primary metabolic process;protein metabolic process;protein modification process;protein phosphory…	cell body;cell part;cytoplasm;intracellular membrane-bounded organelle;intracellular organelle;macromolecular complex;membrane;neuronal cell body;nucleus;organelle;protein complex;synapse	Calcium signaling pathway;ErbB signaling pathway;Gastric acid secretion;Glioma;GnRH signaling pathway;ko05152;Long-term potentiation;Melanogenesis;Neurotrophin signaling pathway;Olfactory transduction;Oocyte meiosis;Phototransduction - fly;Wnt signaling pathway	Acetylation;Alternativesplicing;ATP-binding;Calmodulin-binding;Cellmembrane;Completeproteome;Kinase;Membrane;Nucleotide-binding;Phosphoprotein;Referenceproteome;Sarcoplasmicreticulum;Serine/threonine-proteinkinase;Transferase		CaMKII_AD;Pkinase		+					-4.34294e-08	0	2.44859	-2.8742	-4.34294e-08	0	-4.34294e-08	0	-4.34294e-08	0	-4.34294e-08	0	Q6PHZ2-5
adenyl nucleotide binding;adenyl ribonucleotide binding;ATP binding;binding;catalytic activity;kinase activity;nucleotide binding;phosphotransferase activity, alcohol group as acceptor;protein kinase activity;protein serine/threonine kinase activity;purine nucleotide binding;purine ribonucleoside triphosphate binding;purine ribonucleotide binding;ribonucleotide binding;transferase activity;transf…	cellular metabolic process;cellular process;macromolecule metabolic process;macromolecule modification;metabolic process;phosphorus metabolic process;primary metabolic process;protein metabolic process;protein modification process;protein phosphorylation	cell part;cytoplasm;membrane;plasma membrane		Alternativesplicing;ATP-binding;Cellmembrane;Completeproteome;Cytoplasm;Kinase;Membrane;Nucleotide-binding;Phosphoprotein;Referenceproteome;Serine/threonine-proteinkinase;Transferase		OSR1_C;Pkinase		+					1.27365	-2.04986	1.39286	-2.32203	-4.34294e-08	0	1.59086	-0.241141	1.5295	-0.228042	0.0693036	-0.0287666	Q3UH66;E9Q6Q2;E9QMI9;E9QJQ9;E0CYT1;E9QMI8;E9QM73;Q3UH66-6;Q3UH66-7;Q3UH66-4;Q3UH66-3;Q3UH66-5;E0CZE3;Q3UH66-2	Serine/threonine-protein kinase WNK2	Wnk2
1-acylglycerol-3-phosphate O-acyltransferase activity;acylglycerol O-acyltransferase activity;catalytic activity;O-acyltransferase activity;transferase activity;transferase activity, transferring acyl groups;transferase activity, transferring acyl groups other than amino-acyl groups	biological regulation;biosynthetic process;cellular ketone metabolic process;cellular lipid metabolic process;cellular metabolic process;cellular process;glycerol ether metabolic process;lipid metabolic process;metabolic process;organic acid metabolic process;primary metabolic process;small molecule metabolic process	cell part	Fat digestion and absorption;Glycerolipid metabolism;Glycerophospholipid metabolism	Acyltransferase;Completeproteome;Lipidbiosynthesis;Lipidmetabolism;Membrane;Phospholipidbiosynthesis;Phospholipidmetabolism;Referenceproteome;Transferase;Transmembrane;Transmembranehelix		Acyltransferase		+					1.47587	-2.13942	1.22896	-2.21553	-4.34294e-08	0	0.532872	-0.162716	0.380474	-0.124452	0.082733	-0.0541959	E9PY97;O35083	1-acyl-sn-glycerol-3-phosphate acyltransferase alpha	Agpat1
adenyl nucleotide binding;adenyl ribonucleotide binding;ATP binding;ATPase activity;ATPase activity, coupled;ATP-dependent helicase activity;binding;catalytic activity;helicase activity;hydrolase activity;hydrolase activity, acting on acid anhydrides;hydrolase activity, acting on acid anhydrides, in phosphorus-containing anhydrides;nucleic acid binding;nucleoside-triphosphatase activity;nucleotid…	biological regulation;establishment of localization;nucleobase-containing compound transport;protein transport;response to chemical stimulus;response to stimulus;transport	cell part;cytoplasm;macromolecular complex;membrane;nuclear pore;protein complex		Acetylation;ATP-binding;Completeproteome;Cytoplasm;Helicase;Hydrolase;Membrane;mRNAtransport;Nuclearporecomplex;Nucleotide-binding;Nucleus;Proteintransport;Referenceproteome;RNA-binding;Translocation;Transport		DEAD;Helicase_C		+					0.55673	-2.78106	0.82138	-3.38395	-4.34294e-08	0	0.42724	0.0832238	0.263218	0.0534	0.55491	-0.129216	Q61655;Q8R3C7;Q8BZY3	ATP-dependent RNA helicase DDX19A	Ddx19a;Ddx19b
adenyl nucleotide binding;adenyl ribonucleotide binding;ATP binding;binding;catalytic activity;cation binding;deoxyribonuclease activity;DNA binding;GTP binding;guanyl nucleotide binding;guanyl ribonucleotide binding;hydrolase activity;hydrolase activity, acting on ester bonds;ion binding;kinase activity;magnesium ion binding;metal ion binding;nuclease activity;nucleic acid binding;nucleobase-con…	anatomical structure development;biological regulation;biosynthetic process;cellular component organization;cellular homeostasis;cellular membrane organization;cellular metabolic process;cellular nitrogen compound metabolic process;cellular process;developmental process;endocytosis;establishment of localization;heterocycle metabolic process;homeostatic process;membrane invagination;membrane organ…	cell part;centrosome;cytosol;intracellular membrane-bounded organelle;intracellular non-membrane-bounded organelle;intracellular organelle;membrane;microtubule organizing center;mitochondrion;nucleus;organelle	Purine metabolism;Pyrimidine metabolism	Acetylation;ATP-binding;Completeproteome;Cytoplasm;Differentiation;Directproteinsequencing;Endocytosis;Isopeptidebond;Kinase;Magnesium;Metal-binding;Neurogenesis;Nucleotide-binding;Nucleotidemetabolism;Nucleus;Referenceproteome;Transferase;Ublconjugation		NDK		+					-4.34294e-08	0	4.11392	-3.86018	-4.34294e-08	0	0.113474	-0.0878162	0.0566695	0.0460176	0.379884	-0.22135	P15532;Q5NC81;Q5NC80	Nucleoside diphosphate kinase A;Nucleoside diphosphate kinase	Nme1
	establishment of localization;protein transport;response to chemical stimulus;response to external stimulus;response to extracellular stimulus;response to stimulus;transport	cell part;membrane		Completeproteome;Membrane;Phosphoprotein;Proteintransport;Referenceproteome;Transmembrane;Transmembranehelix;Transport;Ublconjugation		SCAMP		+					0.833844	-1.57261	2.30849	-2.12072	-4.34294e-08	0	0.84455	-0.468716	1.24964	-0.522074	0.268753	-0.223607	O35609;E9Q855;Q3UXS0	Secretory carrier-associated membrane protein 3	Scamp3
adenyl nucleotide binding;adenyl ribonucleotide binding;ATP binding;binding;catalytic activity;kinase activity;nucleotide binding;phosphotransferase activity, alcohol group as acceptor;protein kinase activity;protein serine/threonine kinase activity;purine nucleotide binding;purine ribonucleoside triphosphate binding;purine ribonucleotide binding;ribonucleotide binding;tau-protein kinase activity…	biological regulation;cellular component assembly;cellular component organization;cellular process;cytoskeleton organization;organelle assembly;organelle organization;regulation of protein modification process;response to stimulus;rhythmic process;signal transduction	cell part;centrosome;cytosol;Golgi apparatus;intracellular membrane-bounded organelle;intracellular non-membrane-bounded organelle;intracellular organelle;macromolecular complex;membrane;microtubule organizing center;nucleoplasm;organelle;plasma membrane;protein complex	Circadian rhythm - mammal;Gap junction;Hedgehog signaling pathway	3D-structure;Alternativesplicing;ATP-binding;Biologicalrhythms;Cellmembrane;Completeproteome;Cytoplasm;Cytoskeleton;Golgiapparatus;Kinase;Membrane;Nucleotide-binding;Nucleus;Phosphoprotein;Referenceproteome;Serine/threonine-proteinkinase;Transferase;Wntsignalingpathway		Pkinase		+					-4.34294e-08	0	3.0099	-2.39174	-4.34294e-08	0	0.0350883	-0.0259485	0.0717941	0.049684	0.409852	-0.276763	Q9DC28;A2ABP1;Q3UBT6;Q3USK2;Q9DC28-2;F7A4U8	Casein kinase I isoform delta	Csnk1d
basal RNA polymerase II transcription machinery binding;basal transcription machinery binding;binding;enzyme binding;enzyme inhibitor activity;enzyme regulator activity;protein binding;RNA polymerase binding;RNA polymerase core enzyme binding;RNA polymerase II core binding	biological regulation;cell death;cellular metabolic process;cellular nitrogen compound metabolic process;cellular process;death;macromolecule metabolic process;metabolic process;mRNA metabolic process;mRNA processing;nitrogen compound metabolic process;nucleobase-containing compound metabolic process;primary metabolic process;RNA metabolic process;RNA processing;RNA splicing	cell part;macromolecular complex;ribonucleoprotein complex;spliceosomal complex		Acetylation;Apoptosis;Coiledcoil;Completeproteome;Directproteinsequencing;Metalloenzymeinhibitor;mRNAprocessing;mRNAsplicing;Nucleus;Phosphoprotein;Referenceproteome		DBC1;S1-like		+					0.158432	0.0904536	2.4044	-1.47032	0.128232	0.0768523	0.00877065	-0.00182819	0.334456	-0.076005	0.473062	0.0959206	Q8VDP4	Cell cycle and apoptosis regulator protein 2	Ccar2
structural constituent of myelin sheath;structural molecule activity	biological regulation;cellular component organization;cellular process;membrane organization;response to chemical stimulus;response to stimulus	cell body;cell part;cytoplasm;intracellular membrane-bounded organelle;intracellular organelle;membrane;neuronal cell body;nucleus;organelle;plasma membrane		3D-structure;Acetylation;Alternativesplicing;Autoimmuneencephalomyelitis;Cellmembrane;Citrullination;Completeproteome;Cytoplasm;Directproteinsequencing;Membrane;Methylation;Nucleus;Phosphoprotein;Referenceproteome		Myelin_MBP					+		-4.34294e-08	0	-4.34294e-08	0	-4.34294e-08	0	1.7021	1.55293	3.82403	2.32114	1.87868	1.79595	P04370;P04370-6;P04370-5;P04370-10;P04370-8;F6RWW8;Q542T4;F6ZIA4;F6TYB7;F6VME3;F7A0B0;F6RT34;P04370-14;P04370-13;P04370-7;P04370-11;P04370-9;P04370-4;Q5D096;P04370-2	Myelin basic protein	Mbp
binding;nucleotide binding				Alternativesplicing;Completeproteome;Phosphoprotein;Referenceproteome		DUF2414					+		-4.34294e-08	0	-4.34294e-08	0	-4.34294e-08	0	0.427043	0.635249	3.77346	2.51297	0.916036	1.67665	Q8BZR9;B2KG93;F7BT77	Uncharacterized protein C17orf85 homolog
binding;lipoprotein particle binding;low-density lipoprotein particle binding;protein-lipid complex binding	alcohol metabolic process;cellular component organization;cellular membrane organization;cellular process;developmental process;endocytosis;establishment of localization;lipid metabolic process;lipid transport;membrane invagination;membrane organization;metabolic process;multicellular organismal development;multicellular organismal process;primary metabolic process;small molecule metabolic proces…	cell part;macromolecular complex		Cholesterolmetabolism;Cleavageonpairofbasicresidues;Completeproteome;Developmentalprotein;Disulfidebond;EGF-likedomain;Endocytosis;Glycoprotein;LDL;Lipidmetabolism;Lipidtransport;Membrane;Phosphoprotein;Receptor;Referenceproteome;Repeat;Signal;Steroidmetabolism;Sterolmetabolism;Transmembrane;Transmembranehelix;Transport		fn3;Ldl_recept_a;Ldl_recept_b						+	-4.34294e-08	0	-4.34294e-08	0	-4.34294e-08	0	0.780098	0.320494	0.515072	1.35948	1.76354	4.5615	O88307	Sortilin-related receptor	Sorl1
binding;carbohydrate binding;catalytic activity;intramolecular oxidoreductase activity;intramolecular oxidoreductase activity, interconverting aldoses and ketoses;isomerase activity;monosaccharide binding;ribose-5-phosphate isomerase activity;sugar binding	alcohol metabolic process;carbohydrate metabolic process;cellular metabolic process;cellular process;heterocycle metabolic process;metabolic process;primary metabolic process;small molecule metabolic process	cell part;intracellular membrane-bounded organelle;intracellular organelle;organelle	Carbon fixation in photosynthetic organisms;Pentose phosphate pathway	Completeproteome;Isomerase;Referenceproteome		Rib_5-P_isom_A						+	-4.34294e-08	0	-4.34294e-08	0	-4.34294e-08	0	0.191949	0.7972	1.03815	2.41397	1.2885	2.80742	P47968	Ribose-5-phosphate isomerase	Rpia
adenyl nucleotide binding;adenyl ribonucleotide binding;ATP binding;binding;catalytic activity;ephrin receptor activity;GPI-linked ephrin receptor activity;kinase activity;molecular transducer activity;nucleotide binding;phosphotransferase activity, alcohol group as acceptor;protein kinase activity;protein tyrosine kinase activity;purine nucleotide binding;purine ribonucleoside triphosphate bindi…	anatomical structure development;biological regulation;cellular process;developmental process;locomotion;regulation of organelle organization;regulation of transport;response to chemical stimulus;response to external stimulus;response to stimulus;signal transduction	cell body;cell part;cell projection;endoplasmic reticulum;intracellular membrane-bounded organelle;intracellular organelle;membrane;neuron projection;neuronal cell body;organelle;plasma membrane	Axon guidance	ATP-binding;Cellmembrane;Cellprojection;Completeproteome;Glycoprotein;Kinase;Membrane;Neurogenesis;Nucleotide-binding;Phosphoprotein;Receptor;Referenceproteome;Signal;Transferase;Transmembrane;Transmembranehelix;Tyrosine-proteinkinase		Ephrin_lbd;fn3;Pkinase_Tyr;SAM_1;SAM_2						+	-4.34294e-08	0	-4.34294e-08	0	-4.34294e-08	0	1.70877	0.35387	1.30472	0.423245	5.697	2.69234	E9PUQ2;E9PUP9;E9PUQ0;Q60629;Q6PFV6;E9PUQ4	Ephrin type-A receptor 5	Epha5
5-oxoprolinase (ATP-hydrolyzing) activity;adenyl nucleotide binding;adenyl ribonucleotide binding;ATP binding;binding;catalytic activity;hydrolase activity;hydrolase activity, acting on carbon-nitrogen (but not peptide) bonds;hydrolase activity, acting on carbon-nitrogen (but not peptide) bonds, in cyclic amides;nucleotide binding;purine nucleotide binding;purine ribonucleoside triphosphate bindi…	amine metabolic process;cellular amino acid metabolic process;cellular ketone metabolic process;cellular metabolic process;cellular nitrogen compound metabolic process;cellular process;metabolic process;nitrogen compound metabolic process;organic acid metabolic process;peptide metabolic process;primary metabolic process;small molecule metabolic process;sulfur compound metabolic process		Glutathione metabolism	ATP-binding;Completeproteome;Hydrolase;Nucleotide-binding;Referenceproteome		Hydant_A_N;Hydantoinase_A;Hydantoinase_B						+	-4.34294e-08	0	-4.34294e-08	0	-4.34294e-08	0	0.822773	1.3999	0.220999	0.117465	2.44361	2.62993	Q8K010;E9Q484	5-oxoprolinase	Oplah
A-type (transient outward) potassium channel activity;binding;cation binding;cation channel activity;cation transmembrane transporter activity;channel activity;gated channel activity;ion binding;ion channel activity;ion transmembrane transporter activity;metal ion binding;outward rectifier potassium channel activity;passive transmembrane transporter activity;potassium channel activity;substrate-s…	biological regulation;cellular component assembly;cellular component organization;cellular homeostasis;cellular ion homeostasis;cellular process;homeostatic process;macromolecular complex assembly;protein complex assembly	cell part;cell projection;cell surface;macromolecular complex;membrane;neuron projection;protein complex		Cellprojection;Completeproteome;Ionchannel;Iontransport;Membrane;Metal-binding;Phosphoprotein;Potassium;Potassiumchannel;Potassiumtransport;Referenceproteome;Transmembrane;Transmembranehelix;Transport;Voltage-gatedchannel;Zinc		DUF3399;Ion_trans;K_tetra;Shal-type						+	-4.34294e-08	0	-4.34294e-08	0	-4.34294e-08	0	1.248	-0.399769	0.626281	-0.255914	1.87809	2.42904	Q9Z0V2	Potassium voltage-gated channel subfamily D member 2	Kcnd2
	establishment of localization;transport	cell part		Acetylation;Completeproteome;Membrane;Referenceproteome;Repeat;Transmembrane;Transmembranehelix;Transport								+	-4.34294e-08	0	-4.34294e-08	0	-4.34294e-08	0	0.351235	0.239811	0.145275	0.143824	1.83222	2.40801	Q8R0J2;Q9R0Q9;E9PVP3;Q5F2B1;F6XX36;E9PWT5	Mannose-P-dolichol utilization defect 1 protein	Mpdu1
	biological regulation;cellular homeostasis;cellular process;homeostatic process	cell part		3D-structure;Completeproteome;Glycoprotein;Membrane;Polymorphism;Referenceproteome;Signal;Transmembrane;Transmembranehelix		DnaJ;Thioredoxin						+	-4.34294e-08	0	-4.34294e-08	0	-4.34294e-08	0	0.0598831	0.117603	0.0225168	-0.0280919	2.51045	1.9174	Q80TN4;A2AS90	DnaJ homolog subfamily C member 16	Dnajc16
binding;catalytic activity;GTP binding;GTPase activity;guanyl nucleotide binding;guanyl ribonucleotide binding;hydrolase activity;hydrolase activity, acting on acid anhydrides;hydrolase activity, acting on acid anhydrides, in phosphorus-containing anhydrides;nucleoside-triphosphatase activity;nucleotide binding;purine nucleotide binding;purine ribonucleoside triphosphate binding;purine ribonucleo…	biological regulation;cellular process;response to stimulus;signal transduction	cell part;cytoplasm;membrane		Completeproteome;Cytoplasm;GTP-binding;Nucleotide-binding;Referenceproteome		Ras						+	-4.34294e-08	0	-4.34294e-08	0	-4.34294e-08	0	0.698863	1.0841	0.0452059	-0.0282159	3.42827	1.81427	Q9CR56;A2A5E5;F6XZA4;A2A5E4	NF-kappa-B inhibitor-interacting Ras-like protein 2	Nkiras2
molecular transducer activity;receptor activity;semaphorin receptor activity;signal transducer activity;signaling receptor activity;transmembrane signaling receptor activity	anatomical structure morphogenesis;biological regulation;cellular component morphogenesis;cellular component organization;cellular process;developmental process;multicellular organismal process;regulation of organelle organization	cell part;intracellular;macromolecular complex;protein complex;receptor complex	Axon guidance	Cellmembrane;Coiledcoil;Completeproteome;Disulfidebond;Glycoprotein;Membrane;Phosphoprotein;Receptor;Referenceproteome;Repeat;Signal;Transmembrane;Transmembranehelix	Heterotrimer complex (Rnd1, Rras, Plxnb1);Heterotrimeric complex (Rnd1, Rras, Plxnb1);PlexinA1-PlexinB1 complex	Plexin_cytopl;PSI;Sema;TIG						+	-4.34294e-08	0	-4.34294e-08	0	-4.34294e-08	0	0.406375	0.139928	0.621946	0.224861	3.23153	1.65753	Q8CJH3	Plexin-B1	Plxnb1
										+			-4.34294e-08	0	-4.34294e-08	0	-4.34294e-08	0	1.56913	-3.51619	-4.34294e-08	0	-4.34294e-08	0	D3Z4R5
binding;fibronectin binding;protein binding	alcohol metabolic process;anatomical structure morphogenesis;biological regulation;carbohydrate metabolic process;cell differentiation;cell proliferation;cellular metabolic process;cellular process;developmental process;growth;homeostatic process;metabolic process;molting cycle;multicellular organismal process;primary metabolic process;regulation of translation;response to chemical stimulus;respo…	insulin-like growth factor binding protein complex;macromolecular complex;protein complex		Completeproteome;Directproteinsequencing;Disulfidebond;Growthfactorbinding;Referenceproteome;Secreted;Signal		IGFBP;Thyroglobulin_1				+			-4.34294e-08	0	-4.34294e-08	0	-4.34294e-08	0	4.06635	-2.29451	-4.34294e-08	0	-4.34294e-08	0	Q07079;Q3UQV0	Insulin-like growth factor-binding protein 5	Igfbp5
catalytic activity;choline-phosphate cytidylyltransferase activity;cytidylyltransferase activity;nucleotidyltransferase activity;transferase activity;transferase activity, transferring phosphorus-containing groups	alcohol metabolic process;amine metabolic process;biosynthetic process;cellular lipid metabolic process;cellular metabolic process;cellular nitrogen compound metabolic process;cellular process;lipid metabolic process;metabolic process;multicellular organismal process;nitrogen compound metabolic process;primary metabolic process;rhythmic process;small molecule metabolic process	cell part;endoplasmic reticulum;intracellular membrane-bounded organelle;intracellular organelle;organelle	Glycerophospholipid metabolism;Phosphonate and phosphinate metabolism	Alternativesplicing;Completeproteome;Endoplasmicreticulum;Lipidbiosynthesis;Lipidmetabolism;Nucleotidyltransferase;Phospholipidbiosynthesis;Phospholipidmetabolism;Phosphoprotein;Referenceproteome;Transferase		CTP_transf_2				+			-4.34294e-08	0	-4.34294e-08	0	-4.34294e-08	0	6.0807	3.00537	0.63882	1.13671	1.20829	-0.229486	Q811Q9;A2A450;A2A451;Q811Q9-2	Choline-phosphate cytidylyltransferase B	Pcyt1b
carboxypeptidase activity;catalytic activity;exopeptidase activity;hydrolase activity;peptidase activity;peptidase activity, acting on L-amino acid peptides;serine hydrolase activity;serine-type carboxypeptidase activity;serine-type exopeptidase activity;serine-type peptidase activity	biological regulation;cellular ketone metabolic process;cellular lipid metabolic process;cellular metabolic process;cellular process;hormone metabolic process;lipid metabolic process;macromolecule metabolic process;metabolic process;organic acid metabolic process;primary metabolic process;protein metabolic process;proteolysis;small molecule metabolic process;vitamin metabolic process	cell part;cytosol;extracellular region		Carboxypeptidase;Completeproteome;Glycoprotein;Hydrolase;Protease;Referenceproteome;Secreted;Signal		Peptidase_S10						+	-4.34294e-08	0	-4.34294e-08	0	-4.34294e-08	0	-4.34294e-08	0	-4.34294e-08	0	2.64401	-1.7813	Q920A5;Q3U5P4	Retinoid-inducible serine carboxypeptidase	Scpep1
	biological regulation;regulation of translation	cell part;intracellular membrane-bounded organelle;intracellular organelle;mitochondrion;organelle		Activator;Coiledcoil;Completeproteome;Mitochondrion;Referenceproteome;Translationregulation		Transcrip_reg						+	-4.34294e-08	0	-4.34294e-08	0	-4.34294e-08	0	-4.34294e-08	0	-4.34294e-08	0	2.53541	-1.86267	Q8K0Z7	Translational activator of cytochrome c oxidase 1	Taco1
binding;identical protein binding;protein binding;protein dimerization activity;protein heterodimerization activity;protein homodimerization activity	biological adhesion;biological regulation;cell adhesion;cellular process;response to stimulus;signal transduction	cell part;cell projection;neuron projection		Alternativesplicing;Celladhesion;Cellprojection;Completeproteome;Differentiation;Disulfidebond;EGF-likedomain;Glycoprotein;Membrane;Referenceproteome;Repeat;Transmembrane;Transmembranehelix		Ten_N						+	-4.34294e-08	0	-4.34294e-08	0	-4.34294e-08	0	-4.34294e-08	0	-4.34294e-08	0	2.00881	-2.19194	Q9WTS6;G3X907;Q9WTS6-2;F6RJC1;F7ASN8	Teneurin-3	Tenm3
binding;cation binding;ion binding;metal ion binding;mRNA binding;nucleic acid binding;RNA binding;single-stranded RNA binding;snRNA binding;transition metal ion binding;U1 snRNA binding;zinc ion binding	cellular component assembly;cellular component organization;cellular macromolecular complex assembly;cellular process;macromolecular complex assembly;ribonucleoprotein complex assembly	cell part;macromolecular complex;ribonucleoprotein complex;small nuclear ribonucleoprotein complex;spliceosomal complex	Spliceosome	Acetylation;Completeproteome;Metal-binding;Nucleus;Phosphoprotein;Referenceproteome;Ribonucleoprotein;RNA-binding;Zinc;Zinc-finger		zf-U1						+	-4.34294e-08	0	-4.34294e-08	0	-4.34294e-08	0	-4.34294e-08	0	-4.34294e-08	0	3.2938	-2.37027	Q62241;Q569X3	U1 small nuclear ribonucleoprotein C	Snrpc
												+	-4.34294e-08	0	-4.34294e-08	0	-4.34294e-08	0	-4.34294e-08	0	1.42894	-1.71235	2.86155	-2.60547	D3Z4C5;D3Z588		Celf5
		cell part;cytoplasm		3D-structure;Completeproteome;Cytoplasm;Referenceproteome;Ublconjugationpathway		ubiquitin						+	-4.34294e-08	0	-4.34294e-08	0	-4.34294e-08	0	1.66074	-2.86624	1.43085	-2.4958	1.72491	-2.96282	Q9EPV8;E0CYW1;E0CZB3;E0CY91;E0CY38;E9QJZ1;E9Q068;E0CXL7;G3UWR6	Ubiquitin-like protein 5	Ubl5;Gm16381
												+	-4.34294e-08	0	-4.34294e-08	0	-4.34294e-08	0	-4.34294e-08	0	-4.34294e-08	0	4.9139	-5.13236	F8WGK2
